# Supplementary material for: A multiple phenotype imputation method for genetic diversity and core collection in Taiwanese vegetable soybean
Source: Front Plant Sci. 2022 Sep 2;13:948349. doi: 10.3389/fpls.2022.948349 (PMC9480828; doi:10.3389/fpls.2022.948349)

**Supplementary Table 1.** Correlation coefficient among 46 traits for observed phenotypes and complete (observed plus imputed values) phenotypes.

|  | Correlation coefficient | | |  | Correlation test | |
| --- | --- | --- | --- | --- | --- | --- |
|  | Coefficient range | Correlation strength | Pairs of phenotype |  | Result | Pairs of phenotype |
| **ECraw** |  |  |  |  |  |  |
|  | -0.7 to -1.0 | Very strong | 1 |  | Significant correlation | 327 |
|  | -0.5 to -0.7 | Strong | 1 |  | Non-significant correlation | 524 |
|  | -0.3 to -0.5 | Moderate | 51 |  | Not available | 111 |
|  | 0 to -0.3 | Weak | 341 |  |  |  |
|  | 0 | None | 0 |  |  |  |
|  | 0 to 0.3 | Weak | 382 |  |  |  |
|  | 0.3 to 0.5 | Moderate | 77 |  |  |  |
|  | 0.5 to 0.7 | Strong | 16 |  |  |  |
|  | 0.7 to 1.0 | Very strong | 10 |  |  |  |
|  | Not available |  | 111 |  |  |  |
| **ECimpu** |  |  |  |  |  |  |
|  | -0.7 to -1.0 | Very strong | 0 |  | Significant correlation | 426 |
|  | -0.5 to -0.7 | Strong | 1 |  | Non-significant correlation | 564 |
|  | -0.3 to -0.5 | Moderate | 30 |  | Not available | 0 |
|  | 0 to -0.3 | Weak | 436 |  |  |  |
|  | 0 | None | 0 |  |  |  |
|  | 0 to 0.3 | Weak | 464 |  |  |  |
|  | 0.3 to 0.5 | Moderate | 45 |  |  |  |
|  | 0.5 to 0.7 | Strong | 9 |  |  |  |
|  | 0.7 to 1.0 | Very strong | 5 |  |  |  |
|  | Not available |  | 0 |  |  |  |
| Abbreviation: ECraw, observed entire collection; ECimpu, complete (observed plus imputed values) entire collection. | | | | | | |

**Supplementary Table 2.** Summary information of category and missing rate in all 21 quantitative traits.

| **Quantitative traits** | | | |
| --- | --- | --- | --- |
| **Category** | **Phenotypic traits** | **N** | **Missing rate (%)a** |
| Morphology |  |  |  |
|  | Seed length (mm) | 200 |  |
|  | Seed width (mm) | 200 |  |
|  | Seed thickness (mm) | 200 |  |
|  | Leaflet length (cm) | 200 |  |
|  | Leaflet width (cm) | 200 |  |
|  | Pod length (cm) | 149 | 25.5 |
|  | Pod width (cm) | 149 | 25.5 |
|  | Single pod weight (g) | 99 | 50.5 |
|  | Number of pods per 500g | 99 | 50.5 |
|  | Number of seeds per pod | 50 | 75.0 |
|  | Shelling rate (%) | 150 | 25.0 |
|  | Immature seed length (mm) | 149 | 25.5 |
|  | Immature seed width (mm) | 150 | 25.0 |
|  | Immature seed thickness (mm) | 150 | 25.0 |
| Growth |  |  |  |
|  | Internode length (cm) | 50 | 75.0 |
|  | Plant height (cm) | 198 | 1.0 |
|  | First pod height (cm) | 150 | 25.0 |
| Phenology |  |  |  |
|  | From sowing to flowering (days) | 49 | 75.5 |
|  | From bloom to harvest (days) | 43 | 78.5 |
| Production |  |  |  |
|  | 100 seed weight (g) | 200 |  |
|  | 100 immature seed weight (g) | 149 | 25.5 |
| Abbreviation: N, number of accessions.  aMissing rates were calculated based on 200 accessions. | | | |

**Supplementary Table 3.** Summary information of category and missing rate in all 25qualitative traits.

| **Qualitative traits** | | | |
| --- | --- | --- | --- |
| **Category** | **Phenotypic traits** | **N** | **Missing rate (%)a** |
| Morphology |  |  |  |
|  | Seed shape | 199 | 0.5 |
|  | Seed color | 189 | 5.5 |
|  | Hilum color | 177 | 11.5 |
|  | Hypocotyl coloration | 199 | 0.5 |
|  | Number of nodes on main stem | 99 | 50.5 |
|  | Stem color | 182 | 9.0 |
|  | Number of branches | 199 | 0.5 |
|  | Leaflet size | 150 | 25.0 |
|  | Leaflet shape | 147 | 26.5 |
|  | Leaf color | 150 | 25.0 |
|  | Pubescence density | 199 | 0.5 |
|  | Pubescence color | 197 | 1.5 |
|  | Corolla color | 199 | 0.5 |
|  | Pod set capacity | 149 | 25.5 |
|  | Pod length | 95 | 52.5 |
|  | Pod width | 98 | 51.0 |
|  | Pod shape | 99 | 50.5 |
|  | Pod color | 48 | 76.0 |
|  | Immature seed size | 99 | 50.5 |
|  | Immature seed coat color | 99 | 50.5 |
|  | Immature seed texture | 50 | 75.0 |
|  | Easiness of pod removal | 50 | 75.0 |
|  | Storability | 50 | 75.0 |
| Growth |  |  |  |
|  | Lodging score | 71 | 64.5 |
|  | Plant type | 149 | 25.5 |
| Abbreviation: N, number of accessions.  aMissing rates were calculated based on 200 accessions. | | | |

**Supplementary Table 4.** Difference tests of quantitative traits between observed phenotypes and complete (observed plus imputed values) phenotypes.

| **Phenotypic trait** | **ECraw** | |  | **ECimpu**a | |  | | **Difference test (*p*-value)b** |
| --- | --- | --- | --- | --- | --- | --- | --- | --- |
| **N** | **Mean ± s.d.** |  | **N** | **Mean ± s.d.** | |  |  |
| Seed length (mm) | 200 | 8.96 ± 0.78 |  | 200 | 8.96 ± 0.78 | |  | 1.00 |
| Seed width (mm) | 200 | 8.28 ± 0.59 |  | 200 | 8.28 ± 0.59 | |  | 1.00 |
| Seed thickness (mm) | 200 | 7.10 ± 0.67 |  | 200 | 7.10 ± 0.67 | |  | 1.00 |
| 100 seed weight (g) | 200 | 33.41 ± 7.51 |  | 200 | 33.41 ± 7.51 | |  | 1.00 |
| Internode length (cm) | 50 | 3.79 ± 0.99 |  | 200 | 3.59 ± 0.82 | |  | 0.14 |
| Plant height (cm) | 198 | 37.09 ± 10.71 |  | 200 | 36.97 ± 10.74 | |  | 0.90 |
| Leaflet length (cm) | 200 | 10.60 ± 7.61 |  | 200 | 10.60 ± 7.61 | |  | 1.00 |
| Leaflet width (cm) | 200 | 7.22 ± 1.18 |  | 200 | 7.22 ± 1.18 | |  | 1.00 |
| From sowing to flowering (days) | 49 | 27.45 ± 1.77 |  | 200 | 27.31 ± 1.60 | |  | 0.58 |
| From bloom to harvest (days) | 43 | 66.37 ± 1.73 |  | 200 | 66.52 ± 1.29 | |  | **0.004** |
| Pod length (cm) | 149 | 4.59 ± 0.53 |  | 200 | 4.61 ± 0.50 | |  | 0.64 |
| Pod width (cm) | 149 | 1.22 ± 0.28 |  | 200 | 1.22 ± 0.24 | |  | 0.85 |
| Single pod weight (g) | 99 | 2.10 ± 0.49 |  | 200 | 2.14 ± 0.44 | |  | 0.44 |
| Number of pods per 500g | 99 | 187.83 ± 33.51 |  | 200 | 186.82 ± 33.24 | |  | 0.81 |
| First pod height (cm) | 150 | 11.85 ± 4.41 |  | 200 | 11.53 ± 4.30 | |  | 0.49 |
| Number of seeds per pod | 50 | 2.70 ± 0.86 |  | 200 | 2.95 ± 0.88 | |  | 0.08 |
| Shelling rate (%) | 150 | 56.79 ± 6.97 |  | 200 | 57.16 ± 7.56 | |  | 0.65 |
| Immature seed length (mm) | 149 | 15.49 ± 1.63 |  | 200 | 15.54 ± 1.55 | |  | 0.78 |
| Immature seed width (mm) | 150 | 11.04 ± 3.13 |  | 200 | 10.97 ± 2.81 | |  | 0.81 |
| Immature seed thickness (mm) | 150 | 8.07 ± 0.82 |  | 200 | 8.06 ± 0.83 | |  | 0.88 |
| 100 immature seed weight (g) | 149 | 69.05 ± 14.87 |  | 200 | 68.67 ± 14.62 | |  | 0.81 |
| Abbreviation: ECraw, observed entire collection; ECimpu, complete (observed plus imputed values) entire collection; N, number of germplasms; s.d., standard deviation.  aMultiple phenotypes imputation was used to estimate missing phenotypes. bStudent *t*-test was conducted to test difference among ECraw and ECimpu (the *p*-value smaller than 0.05 is highlighted in bold). | | | | | | | | |

**Supplementary Table 5.** Difference tests of qualitative traits between observed phenotypes and complete (observed plus imputed values) phenotypes.

| **Phenotypic trait** | **ECraw** | |  | **ECimpua** | |  | **Difference test**  **(*p*-value)b** |
| --- | --- | --- | --- | --- | --- | --- | --- |
| **N** | **(%)** |  | **N** | **(%)** |  |
| Seed shape |  |  |  |  |  |  | 1.00 |
| Round | 107 | (53.8) |  | 107 | (53.5) |  |  |
| Oblate | 21 | (10.5) |  | 21 | (10.5) |  |  |
| Oval | 58 | (29.2) |  | 59 | (29.5) |  |  |
| Flat | 13 | (6.5) |  | 13 | (6.5) |  |  |
| Seed coat color |  |  |  |  |  |  | 1.00 |
| Yellowish white | 26 | (13.8) |  | 26 | (13.0) |  |  |
| Yellow | 69 | (36.5) |  | 71 | (35.5) |  |  |
| Green | 92 | (48.7) |  | 101 | (50.5) |  |  |
| Pale brown | 1 | (0.5) |  | 1 | (0.5) |  |  |
| Reddish brown | 1 | (0.5) |  | 1 | (0.5) |  |  |
| Hilum color |  |  |  |  |  |  | 0.99 |
| Light yellow | 13 | (7.3) |  | 15 | (7.5) |  |  |
| Yellow | 58 | (32.8) |  | 62 | (31.0) |  |  |
| Brown | 102 | (57.6) |  | 118 | (59.0) |  |  |
| Green | 4 | (2.3) |  | 5 | (2.5) |  |  |
| Hypocotyl coloration |  |  |  |  |  |  | 1.00 |
| Green | 131 | (65.8) |  | 132 | (66.0) |  |  |
| Purple | 68 | (34.2) |  | 68 | (34.0) |  |  |
| Number of nodes on main stem |  |  |  |  |  |  | **0.0008** |
| Medium | 90 | (90.9) |  | 147 | (73.5) |  |  |
| Large | 9 | (9.1) |  | 53 | (26.5) |  |  |
| Stem color |  |  |  |  |  |  | 0.14 |
| Light green | 106 | (58.2) |  | 106 | (53.0) |  |  |
| Green | 68 | (37.4) |  | 75 | (37.5) |  |  |
| Dark green | 8 | (4.4) |  | 19 | (9.5) |  |  |
| Number of branches |  |  |  |  |  |  | 1.00 |
| Low | 58 | (29.1) |  | 59 | (29.5) |  |  |
| Medium | 79 | (39.7) |  | 79 | (39.5) |  |  |
| High | 62 | (31.2) |  | 62 | (31.0) |  |  |
| Lodging score |  |  |  |  |  |  | **<0.0001** |
| Absent | 64 | (90.1) |  | 116 | (58.0) |  |  |
| Medium | 6 | (8.5) |  | 51 | (25.5) |  |  |
| High | 1 | (1.4) |  | 33 | (16.5) |  |  |
| Leaflet size |  |  |  |  |  |  | 0.23 |
| Small | 81 | (54.0) |  | 92 | (46.0) |  |  |
| Medium | 58 | (38.7) |  | 85 | (42.5) |  |  |
| Large | 11 | (7.3) |  | 23 | (11.5) |  |  |
| Leaflet shape |  |  |  |  |  |  | 0.99 |
| Lanceolate | 1 | (0.7) |  | 1 | (0.5) |  |  |
| Lanceolate to oblong | 37 | (25.2) |  | 54 | (27.0) |  |  |
| Rhomboid | 24 | (16.3) |  | 30 | (15.0) |  |  |
| Oval | 46 | (31.3) |  | 62 | (31.0) |  |  |
| Elliptic | 39 | (26.5) |  | 53 | (26.5) |  |  |
| Leaf color |  |  |  |  |  |  | 0.6 |
| Green | 46 | (30.7) |  | 55 | (27.5) |  |  |
| Dark green | 104 | (69.3) |  | 145 | (72.5) |  |  |
| Plant type |  |  |  |  |  |  | **0.0002** |
| Determinate | 142 | (95.3) |  | 163 | (81.5) |  |  |
| Semi-determinate | 7 | (4.7) |  | 37 | (18.5) |  |  |
| Pubescence density |  |  |  |  |  |  | 1.00 |
| Absent | 4 | (2.0) |  | 5 | (2.5) |  |  |
| Rare | 20 | (10.1) |  | 20 | (10.0) |  |  |
| Sparse | 33 | (16.6) |  | 33 | (16.5) |  |  |
| Medium | 86 | (43.2) |  | 86 | (43.0) |  |  |
| Dense | 56 | (28.1) |  | 56 | (28.0) |  |  |
| Pubescence color |  |  |  |  |  |  | 0.98 |
| Greyish white | 102 | (51.8) |  | 103 | (51.5) |  |  |
| Pale brown | 63 | (32.0) |  | 63 | (31.5) |  |  |
| Brown | 32 | (16.2) |  | 34 | (17.0) |  |  |
| Corolla color |  |  |  |  |  |  | 0.99 |
| White | 138 | (69.4) |  | 138 | (69.0) |  |  |
| Purple throat | 34 | (17.0) |  | 35 | (17.5) |  |  |
| Purple | 27 | (13.6) |  | 27 | (13.5) |  |  |
| Pod set capacity |  |  |  |  |  |  | 0.13 |
| Low | 13 | (8.7) |  | 30 | (15.0) |  |  |
| Medium | 54 | (36.3) |  | 77 | (38.5) |  |  |
| High | 82 | (55.0) |  | 93 | (46.5) |  |  |
| Pod length |  |  |  |  |  |  | 0.59 |
| Short | 16 | (16.8) |  | 44 | (22.0) |  |  |
| Medium | 56 | (59.0) |  | 110 | (55.0) |  |  |
| High | 23 | (24.2) |  | 46 | (23.0) |  |  |
| Pod width |  |  |  |  |  |  | 0.56 |
| Narrow | 23 | (23.5) |  | 58 | (29.0) |  |  |
| Medium | 44 | (44.9) |  | 87 | (43.5) |  |  |
| Broad | 31 | (31.6) |  | 55 | (27.5) |  |  |
| Pod shape |  |  |  |  |  |  | **0.0004** |
| Sword shaped | 91 | (92.0) |  | 147 | (73.5) |  |  |
| Sickle shaped | 8 | (8.0) |  | 53 | (26.5) |  |  |
| Pod color |  |  |  |  |  |  | **0.0012** |
| Light green | 2 | (4.2) |  | 49 | (24.5) |  |  |
| Green | 43 | (89.6) |  | 125 | (62.5) |  |  |
| Dark green | 3 | (6.2) |  | 26 | (13.0) |  |  |
| Immature seed size |  |  |  |  |  |  | 0.84 |
| Small | 22 | (22.2) |  | 47 | (23.5) |  |  |
| Medium | 54 | (54.6) |  | 102 | (51.0) |  |  |
| Large | 23 | (23.2) |  | 51 | (25.5) |  |  |
| Immature seed coat color |  |  |  |  |  |  | 0.03 |
| Light green | 7 | (7.1) |  | 14 | (7.0) |  |  |
| Green | 88 | (88.9) |  | 158 | (79.0) |  |  |
| Purple | 4 | (4.0) |  | 28 | (14.0) |  |  |
| Immature seed texture |  |  |  |  |  |  | **<0.0001** |
| Soft | 3 | (6.0) |  | 75 | (37.5) |  |  |
| Slightly soft | 47 | (94.0) |  | 125 | (62.5) |  |  |
| Easiness of pod removal |  |  |  |  |  |  | 0.16 |
| High | 32 | (64.0) |  | 98 | (49.0) |  |  |
| Medium | 4 | (8.0) |  | 22 | (11.0) |  |  |
| Low | 14 | (28.0) |  | 80 | (40.0) |  |  |
| Storability |  |  |  |  |  |  | 0.65 |
| Poor | 9 | (18.0) |  | 46 | (23.0) |  |  |
| Medium | 17 | (34.0) |  | 71 | (35.5) |  |  |
| Good | 24 | (48.0) |  | 83 | (41.5) |  |  |
| Abbreviation: ECraw, observed entire collection; ECimpu, complete (observed plus imputed values) entire collection; N, number of germplasms; (%), the percentage of each types accounted for the trait.  aMultiple phenotypes imputation was used to estimate missing phenotypes. bChi-squared test was conducted to test difference among ECraw and ECimpu (the *p*-value smaller than 0.05 is highlighted in bold). | | | | | | | |

**Supplementary Table 6.** Difference tests of quantitative traits between the core collection and the complete entire collection in Taiwanese vegetable soybean germplasms.

| **Phenotypic trait** | **Complete entire collection (ECimpu)** | | | | | | |  | | **Core collection (CCimpu)a** | | | | | | |  | **Difference testb** |
| --- | --- | --- | --- | --- | --- | --- | --- | --- | --- | --- | --- | --- | --- | --- | --- | --- | --- | --- |
| **N** | **Min** | **Max** | **Range** | **Mean** | **SD** | **CV(%)** |  | **N** | | **Min** | **Max** | **Range** | **Mean** | **SD** | **CV(%)** |  | ***p*-value** |
| Seed length (mm) | 200 | 7.1 | 11.2 | 4.1 | 9.0 | 0.8 | 8.7 |  | 36 | | 7.2 | 11.0 | 3.8 | 8.8 | 1.1 | 12.1 |  | 0.47 |
| Seed width (mm) | 200 | 6.2 | 9.7 | 3.5 | 8.3 | 0.6 | 7.2 |  | 36 | | 6.3 | 9.7 | 3.4 | 8.1 | 0.8 | 9.8 |  | 0.18 |
| Seed thickness (mm) | 200 | 5.1 | 8.8 | 3.7 | 7.1 | 0.7 | 9.4 |  | 36 | | 5.1 | 8.8 | 3.7 | 6.8 | 0.8 | 11.6 |  | **0.04** |
| 100 seed weight (g) | 200 | 4.2 | 51.2 | 47.0 | 33.4 | 7.5 | 22.5 |  | 36 | | 4.2 | 51.0 | 46.8 | 31.3 | 10.8 | 34.4 |  | 0.27 |
| Internode length (cm) | 200 | 1.7 | 7.0 | 5.3 | 3.6 | 0.8 | 22.9 |  | 36 | | 1.7 | 7.0 | 5.3 | 3.8 | 1.0 | 27.3 |  | 0.14 |
| Plant height (cm) | 200 | 17.3 | 70.7 | 53.4 | 37.0 | 10.7 | 29.1 |  | 36 | | 17.3 | 70.7 | 53.4 | 39.6 | 12.6 | 31.8 |  | 0.20 |
| Leaflet length (cm) | 200 | 7.0 | 116.0 | 109.0 | 10.6 | 7.6 | 71.8 |  | 36 | | 7.2 | 116.0 | 108.8 | 13.4 | 17.7 | 132.2 |  | 0.12 |
| Leaflet width (cm) | 200 | 1.4 | 10.4 | 9.0 | 7.2 | 1.2 | 16.4 |  | 36 | | 1.4 | 10.4 | 9.0 | 7.2 | 1.6 | 22.6 |  | 0.79 |
| From sowing to flowering (days) | 200 | 25.0 | 32.0 | 7.0 | 27.3 | 1.6 | 5.9 |  | 36 | | 25.0 | 32.0 | 7.0 | 27.9 | 1.9 | 6.9 |  | **0.03** |
| From bloom to harvest (days) | 200 | 65.0 | 71.0 | 6.0 | 65.5 | 1.3 | 2.0 |  | 36 | | 65.0 | 71.0 | 6.0 | 65.9 | 1.7 | 2.6 |  | 0.09 |
| Pod length (cm) | 200 | 1.3 | 5.8 | 4.5 | 4.6 | 0.5 | 10.9 |  | 36 | | 1.3 | 5.5 | 4.2 | 4.4 | 0.8 | 18.2 |  | 0.15 |
| Pod width (cm) | 200 | 0.9 | 4.3 | 3.4 | 1.2 | 0.2 | 20.0 |  | 36 | | 0.9 | 4.3 | 3.4 | 1.3 | 0.5 | 41.9 |  | 0.30 |
| Single pod weight (g) | 200 | 0.9 | 3.3 | 2.4 | 2.1 | 0.4 | 20.5 |  | 36 | | 0.9 | 3.1 | 2.2 | 2.1 | 0.5 | 26.1 |  | 0.27 |
| Number of pods per 500g | 200 | 140.0 | 282.0 | 142.0 | 186.8 | 33.2 | 17.8 |  | 36 | | 140.0 | 282.0 | 142.0 | 198.8 | 42.1 | 21.2 |  | 0.11 |
| First pod height (cm) | 200 | 4.2 | 22.3 | 18.1 | 11.5 | 4.3 | 37.3 |  | 36 | | 4.3 | 21.0 | 16.7 | 12.3 | 4.7 | 38.0 |  | 0.34 |
| Number of seeds per pod | 200 | 2.0 | 4.0 | 2.0 | 3.0 | 0.9 | 29.9 |  | 36 | | 2.0 | 4.0 | 2.0 | 2.9 | 0.9 | 30.3 |  | 1.00 |
| Shelling rate (%) | 200 | 4.8 | 75.0 | 70.2 | 57.2 | 7.6 | 13.2 |  | 36 | | 4.8 | 75.0 | 70.2 | 56.6 | 10.9 | 19.3 |  | 0.70 |
| Immature seed length (mm) | 200 | 6.0 | 18.1 | 12.1 | 15.5 | 1.6 | 10.0 |  | 36 | | 6.0 | 18.1 | 12.1 | 15.0 | 2.3 | 15.5 |  | 0.10 |
| Immature seed width (mm) | 200 | 1.1 | 40.9 | 39.8 | 11.0 | 2.8 | 25.6 |  | 36 | | 1.1 | 40.9 | 39.8 | 11.3 | 5.5 | 48.9 |  | 0.63 |
| Immature seed thickness (mm) | 200 | 5.8 | 9.7 | 3.9 | 8.1 | 0.8 | 10.4 |  | 36 | | 6.0 | 9.7 | 3.7 | 8.0 | 0.9 | 10.6 |  | 0.83 |
| 100 immature seed weight (g) | 200 | 6.2 | 100.0 | 93.8 | 68.7 | 14.6 | 21.3 |  | 36 | | 6.8 | 100.0 | 93.2 | 62.4 | 18.6 | 29.9 |  | **0.02** |
| Abbreviation: N, number of germplasms; SD, standard deviation; CV, coefficient of variation; *p*-value, *p*-value of difference test (Student’s *t*-test or Welch’s *t*-test).  aCCimpu was selected from 200 accessions and 46 complete (observed plus imputed values) phenotypic traits by using PowerCore. bStudent’s *t*-test (if assumption of homogeneity of variance is met) and Welch’s *t*-test (if assumption of homogeneity of variance is not met) were used to conduct mean difference among two collections (*p*-value smaller than 0.05 is highlighted in bold). | | | | | | | | | | | | | | | | | | |

**Supplementary Table 7.** Difference tests of qualitative traits between the core collection and the complete entire collection in Taiwanese vegetable soybean germplasms.

| **Phenotypic trait** | **Complete entire collection (ECimpu)** | |  | **Core collectiona (CCimpu)** | |  | **Difference test**  **(*p*-value)b** |
| --- | --- | --- | --- | --- | --- | --- | --- |
| **N** | **(%)** |  | **N** | **(%)** |  |
| Seed shape |  |  |  |  |  |  | 0.65 |
| Round | 107 | (53.5) |  | 16 | (44.4) |  |  |
| Oblate | 21 | (10.5) |  | 6 | (16.7) |  |  |
| Oval | 59 | (29.5) |  | 11 | (30.6) |  |  |
| Flat | 13 | (6.5) |  | 3 | (8.3) |  |  |
| Seed coat color |  |  |  |  |  |  | 0.33 |
| Yellowish white | 26 | (13.0) |  | 4 | (11.2) |  |  |
| Yellow | 71 | (35.5) |  | 15 | (41.7) |  |  |
| Green | 101 | (50.5) |  | 15 | (41.7) |  |  |
| Pale brown | 1 | (0.5) |  | 1 | (2.7) |  |  |
| Reddish brown | 1 | (0.5) |  | 1 | (2.7) |  |  |
| Hilum color |  |  |  |  |  |  | 0.40 |
| Light yellow | 15 | (7.5) |  | 5 | (13.9) |  |  |
| Yellow | 62 | (31.0) |  | 12 | (33.3) |  |  |
| Brown | 118 | (59.0) |  | 17 | (47.2) |  |  |
| Green | 5 | (2.5) |  | 2 | (5.6) |  |  |
| Hypocotyl coloration |  |  |  |  |  |  | 0.18 |
| Green | 132 | (66.0) |  | 19 | (52.8) |  |  |
| Purple | 68 | (34.0) |  | 17 | (47.2) |  |  |
| Number of nodes on main stem |  |  |  |  |  |  | 0.52 |
| Medium | 147 | (73.5) |  | 24 | (66.7) |  |  |
| Large | 53 | (26.5) |  | 12 | (33.3) |  |  |
| Stem color |  |  |  |  |  |  | 0.73 |
| Light green | 106 | (53.0) |  | 17 | (47.2) |  |  |
| Green | 75 | (37.5) |  | 16 | (44.5) |  |  |
| Dark green | 19 | (9.5) |  | 3 | (8.3) |  |  |
| Number of branches |  |  |  |  |  |  | 0.68 |
| Low | 59 | (29.5) |  | 9 | (25.0) |  |  |
| Medium | 79 | (39.5) |  | 17 | (47.2) |  |  |
| High | 62 | (31.0) |  | 10 | (27.8) |  |  |
| Lodging score |  |  |  |  |  |  | 0.13 |
| Absent | 116 | (58.0) |  | 23 | (63.9) |  |  |
| Medium | 51 | (25.5) |  | 4 | (11.1) |  |  |
| High | 33 | (16.5) |  | 9 | (25.0) |  |  |
| Leaflet size |  |  |  |  |  |  | 0.86 |
| Small | 92 | (46.0) |  | 23 | (63.9) |  |  |
| Medium | 85 | (42.5) |  | 4 | (11.1) |  |  |
| Large | 23 | (11.5) |  | 9 | (25.0) |  |  |
| Leaflet shape |  |  |  |  |  |  | 0.58 |
| Lanceolate | 1 | (0.5) |  | 1 | (2.8) |  |  |
| Lanceolate to oblong | 54 | (27.0) |  | 9 | (25.0) |  |  |
| Rhomboid | 30 | (15.0) |  | 4 | (11.1) |  |  |
| Oval | 62 | (31.0) |  | 10 | (27.8) |  |  |
| Elliptic | 53 | (26.5) |  | 12 | (33.3) |  |  |
| Leaf color |  |  |  |  |  |  | 0.40 |
| Green | 55 | (27.5) |  | 13 | (36.1) |  |  |
| Dark green | 145 | (72.5) |  | 23 | (63.9) |  |  |
| Plant type |  |  |  |  |  |  | 0.29 |
| Determinate | 163 | (81.5) |  | 26 | (72.2) |  |  |
| Semi-determinate | 37 | (18.5) |  | 10 | (27.8) |  |  |
| Pubescence density |  |  |  |  |  |  | 0.49 |
| Absent | 5 | (2.5) |  | 2 | (5.6) |  |  |
| Rare | 20 | (10.0) |  | 6 | (16.7) |  |  |
| Sparse | 33 | (16.5) |  | 7 | (19.4) |  |  |
| Medium | 86 | (43.0) |  | 11 | (30.5) |  |  |
| Dense | 56 | (28.0) |  | 10 | (27.8) |  |  |
| Pubescence color |  |  |  |  |  |  | 0.43 |
| Greyish white | 103 | (51.5) |  | 15 | (41.7) |  |  |
| Pale brown | 63 | (31.5) |  | 12 | (33.3) |  |  |
| Brown | 34 | (17.0) |  | 9 | (25.0) |  |  |
| Corolla color |  |  |  |  |  |  | 0.25 |
| White | 138 | (69.0) |  | 20 | (55.6) |  |  |
| Purple throat | 35 | (17.5) |  | 8 | (22.2) |  |  |
| Purple | 27 | (13.5) |  | 8 | (22.2) |  |  |
| Pod set capacity |  |  |  |  |  |  | 0.99 |
| Low | 30 | (15.0) |  | 5 | (13.9) |  |  |
| Medium | 77 | (38.5) |  | 13 | (36.1) |  |  |
| High | 93 | (46.5) |  | 18 | (50.0) |  |  |
| Pod length |  |  |  |  |  |  | **0.04** |
| Short | 44 | (22.0) |  | 14 | (38.9) |  |  |
| Medium | 110 | (55.0) |  | 12 | (33.3) |  |  |
| Long | 46 | (23.0) |  | 10 | (27.8) |  |  |
| Pod width |  |  |  |  |  |  | 0.37 |
| Narrow | 58 | (29.0) |  | 13 | (36.1) |  |  |
| Medium | 87 | (43.5) |  | 17 | (47.2) |  |  |
| Broad | 55 | (27.5) |  | 6 | (16.7) |  |  |
| Pod shape |  |  |  |  |  |  | 1.00 |
| Sword shaped | 147 | (92.0) |  | 26 | (72.2) |  |  |
| Sickle shaped | 53 | (8.0) |  | 10 | (27.8) |  |  |
| Pod color |  |  |  |  |  |  | 0.49 |
| Light green | 49 | (24.5) |  | 12 | (33.3) |  |  |
| Green | 125 | (62.5) |  | 19 | (52.8) |  |  |
| Dark green | 26 | (13.0) |  | 5 | (13.9) |  |  |
| Immature seed size |  |  |  |  |  |  | 0.85 |
| Small | 47 | (23.5) |  | 10 | (27.8) |  |  |
| Medium | 102 | (51.0) |  | 17 | (47.2) |  |  |
| Large | 51 | (25.5) |  | 9 | (25.0) |  |  |
| Immature seed coat color |  |  |  |  |  |  | 0.05 |
| Light green | 14 | (7.0) |  | 6 | (16.7) |  |  |
| Green | 158 | (79.0) |  | 22 | (61.1) |  |  |
| Purple | 28 | (14.0) |  | 8 | (22.2) |  |  |
| Immature seed texture |  |  |  |  |  |  | 1.00 |
| Soft | 75 | (37.5) |  | 14 | (38.9) |  |  |
| Slightly soft | 125 | (62.5) |  | 22 | (61.1) |  |  |
| Easiness of pod removal |  |  |  |  |  |  | 0.90 |
| High | 98 | (49.0) |  | 19 | (52.8) |  |  |
| Medium | 22 | (11.0) |  | 4 | (11.1) |  |  |
| Low | 80 | (40.0) |  | 13 | (36.1) |  |  |
| Storability |  |  |  |  |  |  | 0.87 |
| Poor | 46 | (23.0) |  | 46 | (19.4) |  |  |
| Medium | 71 | (35.5) |  | 71 | (38.9) |  |  |
| Good | 83 | (41.5) |  | 83 | (41.7) |  |  |
| Abbreviation: N, number of germplasms; %, the percentage of each types accounted for the trait.  aCCimpu was selected from 200 accessions and 46 complete (observed plus imputed values) phenotypes by using PowerCore. bChi-squared test was conducted to test difference among the ECimpu and the CCimpu (*p*-value smaller than 0.05 is highlighted in bold). | | | | | | | |

**Supplementary Table 8.** Difference tests of quantitative traits (observed values only) between the core collection and the entire collection in Taiwanese vegetable soybean germplasms.

| **Phenotypic trait** | **Observed entire collection (ECraw)** | | | | | | |  | | **Core collection (CCraw)a** | | | | | | |  | **Difference testb** |
| --- | --- | --- | --- | --- | --- | --- | --- | --- | --- | --- | --- | --- | --- | --- | --- | --- | --- | --- |
| **N** | **Min** | **Max** | **Range** | **Mean** | **SD** | **CV(%)** |  | **N** | | **Min** | **Max** | **Range** | **Mean** | **SD** | **CV(%)** |  | ***p*-value** |
| Seed length (mm) | 200 | 7.1 | 11.2 | 4.1 | 9.0 | 0.8 | 8.7 |  | 43 | | 7.1 | 11.1 | 4.0 | 9.0 | 1.0 | 11.6 |  | 0.68 |
| Seed width (mm) | 200 | 6.2 | 9.7 | 3.5 | 8.3 | 0.6 | 7.2 |  | 43 | | 6.2 | 9.7 | 3.5 | 8.1 | 0.8 | 9.6 |  | 0.21 |
| Seed thickness (mm) | 200 | 5.1 | 8.8 | 3.7 | 7.1 | 0.7 | 9.4 |  | 43 | | 5.1 | 8.8 | 3.7 | 6.9 | 0.8 | 11.3 |  | 0.06 |
| 100 seed weight (g) | 200 | 4.2 | 51.2 | 47.0 | 33.4 | 7.5 | 22.5 |  | 43 | | 4.2 | 51.2 | 47.0 | 30.9 | 10.3 | 33.5 |  | 0.14 |
| Internode length (cm) | 50 | 1.7 | 7.0 | 5.3 | 3.8 | 1.0 | 26.1 |  | 9 | | 2.2 | 7.0 | 4.8 | 4.0 | 1.6 | 39.2 |  | 0.65 |
| Plant height (cm) | 198 | 17.3 | 70.7 | 53.4 | 37.1 | 10.7 | 28.9 |  | 43 | | 17.3 | 70.7 | 53.4 | 39.1 | 12.5 | 32.0 |  | 0.29 |
| Leaflet length (cm) | 200 | 7.0 | 116.0 | 109.0 | 10.6 | 7.6 | 71.8 |  | 43 | | 7.4 | 116.0 | 108.6 | 13.0 | 16.2 | 124.5 |  | 0.14 |
| Leaflet width (cm) | 200 | 1.4 | 10.4 | 9.0 | 7.2 | 1.2 | 16.4 |  | 43 | | 2.2 | 10.4 | 8.2 | 7.11 | 1.4 | 20.2 |  | 0.60 |
| From sowing to flowering (days) | 49 | 25.0 | 32.0 | 7.0 | 27.5 | 1.8 | 6.4 |  | 12 | | 25.0 | 32.0 | 7.0 | 27.8 | 2.2 | 7.8 |  | 0.52 |
| From bloom to harvest (days) | 43 | 65.0 | 71.0 | 6.0 | 66.4 | 1.7 | 2.6 |  | 11 | | 65.0 | 70.0 | 5.0 | 66.8 | 1.7 | 2.5 |  | 0.45 |
| Pod length (cm) | 149 | 1.3 | 5.8 | 4.5 | 4.6 | 0.5 | 11.6 |  | 34 | | 1.3 | 5.8 | 4.5 | 4.5 | 0.8 | 18.0 |  | 0.25 |
| Pod width (cm) | 149 | 0.9 | 4.3 | 3.4 | 1.2 | 0.3 | 22.6 |  | 34 | | 0.9 | 4.3 | 3.4 | 1.3 | 0.6 | 43.0 |  | 0.44 |
| Single pod weight (g) | 99 | 0.9 | 3.3 | 2.4 | 2.1 | 0.5 | 23.3 |  | 25 | | 0.9 | 3.3 | 2.4 | 2.1 | 0.6 | 29.0 |  | 0.93 |
| Number of pods per 500g | 99 | 140.0 | 282.0 | 142.0 | 187.8 | 33.5 | 17.8 |  | 25 | | 140.0 | 265.0 | 125.0 | 196.5 | 39.7 | 20.2 |  | 0.27 |
| First pod height (cm) | 150 | 4.2 | 22.3 | 18.1 | 11.9 | 4.4 | 37.3 |  | 34 | | 4.2 | 21.0 | 16.8 | 11.6 | 5.1 | 43.8 |  | 0.76 |
| Number of seeds per pod | 50 | 2.0 | 4.0 | 2.0 | 2.7 | 0.9 | 32.0 |  | 9 | | 2.0 | 4.0 | 2.0 | 2.9 | 0.9 | 32.1 |  | 0.55 |
| Shelling rate (%) | 150 | 4.8 | 75.0 | 70.2 | 56.8 | 7.0 | 12.3 |  | 34 | | 4.8 | 75.0 | 70.2 | 55.1 | 10.6 | 19.2 |  | 0.25 |
| Immature seed length (mm) | 149 | 6.0 | 18.1 | 12.1 | 15.5 | 1.6 | 10.5 |  | 33 | | 6.0 | 18.1 | 12.1 | 15.2 | 2.4 | 15.5 |  | 0.41 |
| Immature seed width (mm) | 150 | 1.1 | 40.9 | 39.8 | 11.0 | 3.1 | 28.3 |  | 34 | | 1.1 | 40.9 | 39.8 | 11.3 | 5.8 | 50.9 |  | 0.68 |
| Immature seed thickness (mm) | 150 | 5.8 | 9.7 | 3.9 | 8.1 | 0.8 | 10.2 |  | 34 | | 6.0 | 9.7 | 3.7 | 7.9 | 0.9 | 10.9 |  | 0.33 |
| 100 immature seed weight (g) | 149 | 6.2 | 100.0 | 93.8 | 69.1 | 14.9 | 21.5 |  | 34 | | 6.8 | 98.0 | 91.2 | 63.1 | 18.6 | 29.5 |  | 0.05 |
| Abbreviation: N, number of germplasms; SD, standard deviation; CV, coefficient of variation; *p*-value, *p*-value of difference test (Student’s *t*-test or Welch’s *t*-test).  aCCraw was selected from 200 accessions and 46 phenotypes (observed values only) by using PowerCore. bStudent’s *t*-test (if assumption of homogeneity of variance is met) and Welch’s *t*-test (if assumption of homogeneity of variance is not met) were used to conduct mean difference among two collections. | | | | | | | | | | | | | | | | | | |

**Supplementary Table 9.** Difference tests of qualitative traits (observed values only) between the core collection and the entire collection in Taiwanese vegetable soybean germplasms.

| **Phenotypic trait** | **Observed entire collection (ECraw)** | |  | **Core collection (CCraw)a** | |  | **Difference testb** |
| --- | --- | --- | --- | --- | --- | --- | --- |
| **N** | **Classes** |  | **N** | **Classes** |  | ***p*-value** |
| Seed shape | 199 | 4 |  | 43 | 4 |  | 0.27 |
| Seed coat color | 189 | 5 |  | 40 | 5 |  | 0.32 |
| Hilum color | 177 | 4 |  | 35 | 4 |  | 0.64 |
| Hypocotyl coloration | 199 | 2 |  | 43 | 2 |  | 0.29 |
| Number of nodes on main stem | 99 | 2 |  | 25 | 2 |  | 0.95 |
| Stem color | 182 | 3 |  | 39 | 3 |  | 0.71 |
| Number of branches | 199 | 3 |  | 43 | 3 |  | 0.73 |
| Lodging score | 71 | 3 |  | 13 | 3 |  | 0.27 |
| Leaflet size | 150 | 3 |  | 30 | 3 |  | 0.69 |
| Leaflet shape | 147 | 5 |  | 33 | 5 |  | 0.50 |
| Leaf color | 150 | 2 |  | 34 | 2 |  | 0.33 |
| Plant type | 149 | 2 |  | 33 | 2 |  | 0.56 |
| Pubescence density | 199 | 5 |  | 43 | 5 |  | 0.46 |
| Pubescence color | 197 | 3 |  | 42 | 3 |  | 0.30 |
| Corolla color | 199 | 3 |  | 43 | 3 |  | 0.51 |
| Pod set capacity | 149 | 3 |  | 34 | 3 |  | 0.91 |
| Pod length | 95 | 3 |  | 25 | 3 |  | 0.41 |
| Pod width | 98 | 3 |  | 25 | 3 |  | 0.94 |
| Pod shape | 99 | 2 |  | 25 | 2 |  | 0.17 |
| Pod color | 48 | 3 |  | 9 | 3 |  | 0.59 |
| Immature seed size | 99 | 3 |  | 22 | 3 |  | 0.66 |
| Immature seed coat color | 99 | 3 |  | 22 | 3 |  | 0.57 |
| Immature seed texture | 50 | 2 |  | 9 | 2 |  | 1.00 |
| Easiness of pod removal | 50 | 3 |  | 9 | 3 |  | 0.91 |
| Storability | 50 | 3 |  | 9 | 3 |  | 0.86 |
| Abbreviation: N, number of germplasms; Classes, types of the traits.  aCCraw was selected from 200 accessions and 46 phenotypes (observed values only) by using PowerCore. bChi-squared test was conducted to test for difference among two collections. | | | | | | | |

**Supplementary Table 10.** Diversity comparisons between the core collection and the complete entire collection in Taiwanese vegetable soybean germplasms.

| Phenotypic traits | Clusters & diversity | | | | | | |  | Diversity  retained / lost | |
| --- | --- | --- | --- | --- | --- | --- | --- | --- | --- | --- |
| Complete  entire collection  (ECimpu) | | |  | Core collection  (CCimpu)a | | |  |
| *k*ECb | H′ | Nei’s |  | *k*CC | H′ | Nei’s |  | H′ | Nei’s |
| **Quantitative traits** |  |  |  |  |  |  |  |  |  |  |
| Seed length (mm) | 7 | 0.93 | 0.82 |  | 7 | 0.92 | 0.82 |  | -2% | **0%** |
| Seed width (mm) | 7 | 0.91 | 0.81 |  | 7 | 0.97 | 0.84 |  | **7%** | **4%** |
| Seed thickness (mm) | 7 | 0.98 | 0.85 |  | 7 | 0.96 | 0.83 |  | -3% | -2% |
| 100 seed weight (g) | 7 | 0.99 | 0.85 |  | 7 | 0.97 | 0.84 |  | -2% | -1% |
| Internode length (cm) | 7 | 0.96 | 0.84 |  | 7 | 0.99 | 0.85 |  | **3%** | **2%** |
| Plant height (cm) | 6 | 0.98 | 0.82 |  | 6 | 0.85 | 0.74 |  | -13% | -10% |
| Leaflet length (cm) | 8 | 0.92 | 0.84 |  | 8 | 0.87 | 0.80 |  | -5% | -6% |
| Leaflet width (cm) | 8 | 0.91 | 0.84 |  | 8 | 0.94 | 0.85 |  | **2%** | **1%** |
| From sowing to flowering (days) | 4 | 0.93 | 0.71 |  | 4 | 0.94 | 0.71 |  | **1%** | **0%** |
| From bloom to harvest (days) | 2 | 0.33 | 0.11 |  | 2 | 0.58 | 0.24 |  | **78%** | **112%** |
| Pod length (cm) | 7 | 0.92 | 0.82 |  | 7 | 0.85 | 0.77 |  | -7% | -7% |
| Pod width (cm) | 3 | 0.99 | 0.66 |  | 3 | 0.99 | 0.66 |  | **0%** | **0%** |
| Single pod weight (g) | 8 | 0.90 | 0.82 |  | 7 | 0.93 | 0.83 |  | **4%** | **0%** |
| Number of pods per 500g | 7 | 0.92 | 0.82 |  | 7 | 0.92 | 0.82 |  | **0%** | -1% |
| First pod height (cm) | 6 | 0.98 | 0.82 |  | 6 | 0.95 | 0.80 |  | -3% | -2% |
| Number of seeds per pod | 3 | 0.97 | 0.65 |  | 3 | 0.97 | 0.65 |  | **0%** | **0%** |
| Shelling rate (%) | 10 | 0.92 | 0.86 |  | 10 | 0.88 | 0.83 |  | -4% | -4% |
| Immature seed length (mm) | 7 | 0.91 | 0.81 |  | 7 | 0.96 | 0.83 |  | **5%** | **3%** |
| Immature seed width (mm) | 8 | 0.90 | 0.84 |  | 8 | 0.91 | 0.82 |  | **0%** | -1% |
| Immature seed thickness (mm) | 7 | 0.95 | 0.83 |  | 7 | 0.89 | 0.79 |  | -6% | -4% |
| 100 immature seed weight (g) | 8 | 0.92 | 0.84 |  | 8 | 0.80 | 0.74 |  | -13% | -11% |
| **Qualitative traits** |  |  |  |  |  |  |  |  |  |  |
| Seed shape | 4 | 0.80 | 0.61 |  | 4 | 0.89 | 0.67 |  | **11%** | **10%** |
| Seed coat color | 5 | 0.64 | 0.60 |  | 5 | 0.73 | 0.64 |  | **14%** | **7%** |
| Hilum color | 4 | 0.69 | 0.55 |  | 4 | 0.83 | 0.64 |  | **20%** | **16%** |
| Hypocotyl coloration | 2 | 0.92 | 0.45 |  | 2 | 1.00 | 0.50 |  | **9%** | **11%** |
| Number of nodes on main stem | 2 | 0.83 | 0.39 |  | 2 | 0.92 | 0.44 |  | **11%** | **13%** |
| Stem color | 3 | 0.84 | 0.57 |  | 3 | 0.84 | 0.57 |  | **0%** | **0%** |
| Number of branches | 3 | 0.99 | 0.66 |  | 3 | 0.96 | 0.64 |  | -3% | -3% |
| Lodging score | 3 | 0.88 | 0.57 |  | 3 | 0.80 | 0.52 |  | -9% | -9% |
| Leaflet size | 3 | 0.88 | 0.59 |  | 3 | 0.91 | 0.61 |  | **3%** | **3%** |
| Leaflet shape | 5 | 0.86 | 0.74 |  | 5 | 0.88 | 0.74 |  | **2%** | **0%** |
| Leaf color | 2 | 0.85 | 0.40 |  | 2 | 0.94 | 0.46 |  | **11%** | **15%** |
| Plant type | 2 | 0.69 | 0.30 |  | 2 | 0.85 | 0.40 |  | **23%** | **33%** |
| Pubescence density | 5 | 0.83 | 0.70 |  | 5 | 0.93 | 0.76 |  | **12%** | **9%** |
| Pubescence color | 3 | 0.92 | 0.61 |  | 3 | 0.98 | 0.65 |  | **7%** | **7%** |
| Corolla color | 3 | 0.76 | 0.48 |  | 3 | 0.91 | 0.59 |  | **20%** | **23%** |
| Pod set capacity | 3 | 0.92 | 0.61 |  | 3 | 0.90 | 0.60 |  | -2% | -2% |
| Pod length | 3 | 0.91 | 0.60 |  | 3 | 0.99 | 0.66 |  | **9%** | **10%** |
| Pod width | 3 | 0.98 | 0.65 |  | 3 | 0.93 | 0.62 |  | -5% | -5% |
| Pod shape | 2 | 0.83 | 0.39 |  | 2 | 0.85 | 0.40 |  | **2%** | **3%** |
| Pod color | 3 | 0.82 | 0.53 |  | 3 | 0.89 | 0.59 |  | **9%** | **11%** |
| Immature seed size | 3 | 0.94 | 0.62 |  | 3 | 0.96 | 0.64 |  | **2%** | **3%** |
| Immature seed coat color | 3 | 0.59 | 0.35 |  | 3 | 0.85 | 0.55 |  | **44%** | **57%** |
| Immature seed texture | 2 | 0.95 | 0.47 |  | 2 | 0.96 | 0.48 |  | **1%** | **2%** |
| Easiness of pod removal | 3 | 0.87 | 0.59 |  | 3 | 0.86 | 0.58 |  | -1% | -2% |
| Storability | 3 | 0.97 | 0.65 |  | 3 | 0.96 | 0.64 |  | -1% | -2% |
| Abbreviation: *k*EC, number of clusters in the ECimpu; *k*CC, number of clusters in the CCimpu; H′, Shannon-Weaver diversity index; Nei’s, Nei’s diversity index.  aCCimpu was selected using PowerCore for mixed-type phenotypic traits. bClustering analyses for quantitative traits were conducted using weighted *k*-means clustering algorithm. Phenotypic diversity richness or evenness retained in the CCimpu is highlighted in bold. | | | | | | | | | | |

**Supplementary Table 11.** Diversity comparisons between the core collection and the observed entire collection in vegetable soybean in Taiwanese vegetable soybean germplasms.

| Phenotypic traits | Clusters & diversity | | | | | | | | |  | Diversity  retained / lost | |
| --- | --- | --- | --- | --- | --- | --- | --- | --- | --- | --- | --- | --- |
| Observed  entire collection  (ECraw) | | | |  | Core collection  (CCraw)a | | | |  |
| N | *k*ECb | H′ | Nei’s |  | N | *k*CC | H′ | Nei’s |  | H′ | Nei’s |
| **Quantitative traits** |  |  |  |  |  |  |  |  |  |  |  |  |
| Seed length (mm) | 200 | 6 | 0.95 | 0.81 |  | 43 | 6 | 0.99 | 0.83 |  | **4%** | **2%** |
| Seed width (mm) | 200 | 7 | 0.96 | 0.84 |  | 43 | 7 | 0.92 | 0.82 |  | **3%** | **1%** |
| Seed thickness (mm) | 200 | 6 | 0.97 | 0.81 |  | 43 | 6 | 0.96 | 0.81 |  | -2% | -1% |
| 100 seed weight (g) | 200 | 6 | 0.97 | 0.81 |  | 43 | 6 | 0.96 | 0.81 |  | **3%** | **2%** |
| Internode length (cm) | 50 | 7 | 0.92 | 0.81 |  | 9 | 5 | 0.73 | 0.72 |  | -19% | -10% |
| Plant height (cm) | 198 | 6 | 0.95 | 0.80 |  | 43 | 6 | 0.94 | 0.80 |  | -3% | -2% |
| Leaflet length (cm) | 200 | 8 | 0.90 | 0.83 |  | 43 | 8 | 0.95 | 0.85 |  | **3%** | **1%** |
| Leaflet width (cm) | 200 | 8 | 0.90 | 0.83 |  | 43 | 8 | 0.93 | 0.84 |  | **2%** | **0%** |
| From sowing to flowering (days) | 49 | 6 | 0.79 | 0.71 |  | 12 | 6 | 0.95 | 0.81 |  | **13%** | **8%** |
| From bloom to harvest (days) | 43 | 6 | 0.36 | 0.35 |  | 11 | 2 | 0.99 | 0.50 |  | **3%** | **4%** |
| Pod length (cm) | 149 | 9 | 0.93 | 0.86 |  | 34 | 9 | 0.96 | 0.87 |  | **2%** | **1%** |
| Pod width (cm) | 149 | 2 | 0.90 | 0.44 |  | 34 | 2 | 0.87 | 0.42 |  | -3% | -4% |
| Single pod weight (g) | 99 | 10 | 0.94 | 0.87 |  | 25 | 10 | 0.90 | 0.85 |  | **3%** | **1%** |
| Number of pods per 500g | 99 | 7 | 0.96 | 0.84 |  | 25 | 7 | 0.94 | 0.83 |  | -1% | **1%** |
| First pod height (cm) | 150 | 6 | 0.98 | 0.82 |  | 34 | 6 | 0.98 | 0.82 |  | **0%** | **0%** |
| Number of seeds per pod | 50 | 2 | 0.98 | 0.49 |  | 9 | 2 | 0.99 | 0.49 |  | **0%** | **0%** |
| Shelling rate (%) | 150 | 9 | 0.91 | 0.85 |  | 33 | 9 | 0.91 | 0.84 |  | **1%** | **0%** |
| Immature seed length (mm) | 149 | 7 | 0.92 | 0.82 |  | 32 | 7 | 0.88 | 0.78 |  | -3% | -5% |
| Immature seed width (mm) | 150 | 7 | 0.95 | 0.83 |  | 33 | 7 | 0.92 | 0.82 |  | **4%** | **2%** |
| Immature seed thickness (mm) | 150 | 7 | 0.98 | 0.84 |  | 33 | 7 | 0.93 | 0.81 |  | -3% | -2% |
| 100 immature seed weight (g) | 149 | 9 | 0.96 | 0.87 |  | 33 | 9 | 0.89 | 0.83 |  | **4%** | **2%** |
| **Qualitative traits** |  |  |  |  |  |  |  |  |  |  |  |  |
| Seed shape | 199 | 4 | 0.80 | 0.61 |  | 43 | 4 | 0.87 | 0.67 |  | **9%** | **9%** |
| Seed coat color | 189 | 5 | 0.65 | 0.61 |  | 40 | 5 | 0.77 | 0.68 |  | **19%** | **11%** |
| Hilum color | 177 | 4 | 0.69 | 0.55 |  | 35 | 4 | 0.75 | 0.59 |  | **8%** | **7%** |
| Hypocotyl coloration | 199 | 2 | 0.93 | 0.45 |  | 43 | 2 | 0.99 | 0.49 |  | **7%** | **10%** |
| Number of nodes on main stem | 99 | 2 | 0.44 | 0.17 |  | 25 | 2 | 0.53 | 0.21 |  | **20%** | **28%** |
| Stem color | 182 | 3 | 0.75 | 0.52 |  | 39 | 3 | 0.72 | 0.52 |  | -4% | **0%** |
| Number of branches | 199 | 3 | 0.99 | 0.66 |  | 43 | 3 | 0.97 | 0.65 |  | -2% | -2% |
| Lodging score | 71 | 3 | 0.33 | 0.18 |  | 13 | 3 | 0.63 | 0.38 |  | **90%** | **110%** |
| Leaflet size | 150 | 3 | 0.81 | 0.55 |  | 30 | 3 | 0.74 | 0.53 |  | -9% | -5% |
| Leaflet shape | 147 | 5 | 0.87 | 0.74 |  | 33 | 5 | 0.88 | 0.73 |  | **2%** | -1% |
| Leaf color | 150 | 2 | 0.89 | 0.43 |  | 34 | 2 | 0.98 | 0.48 |  | **10%** | **14%** |
| Plant type | 149 | 2 | 0.27 | 0.09 |  | 33 | 2 | 0.44 | 0.17 |  | **61%** | **85%** |
| Pubescence density | 199 | 5 | 0.82 | 0.70 |  | 43 | 5 | 0.87 | 0.73 |  | **6%** | **5%** |
| Pubescence color | 197 | 3 | 0.91 | 0.60 |  | 42 | 3 | 0.96 | 0.64 |  | **5%** | **5%** |
| Corolla color | 199 | 3 | 0.75 | 0.47 |  | 43 | 3 | 0.85 | 0.55 |  | **14%** | **17%** |
| Pod set capacity | 149 | 3 | 0.83 | 0.56 |  | 34 | 3 | 0.81 | 0.54 |  | -2% | -3% |
| Pod length | 95 | 3 | 0.87 | 0.57 |  | 25 | 3 | 0.97 | 0.65 |  | **12%** | **14%** |
| Pod width | 98 | 3 | 0.97 | 0.64 |  | 25 | 3 | 0.96 | 0.63 |  | -1% | -2% |
| Pod shape | 99 | 2 | 0.41 | 0.15 |  | 25 | 2 | 0.72 | 0.32 |  | **78%** | **115%** |
| Pod color | 48 | 3 | 0.37 | 0.19 |  | 9 | 3 | 0.62 | 0.37 |  | **69%** | **93%** |
| Immature seed size | 99 | 3 | 0.91 | 0.60 |  | 22 | 3 | 0.96 | 0.64 |  | **6%** | **7%** |
| Immature seed coat color | 99 | 3 | 0.38 | 0.20 |  | 22 | 3 | 0.55 | 0.31 |  | **42%** | **55%** |
| Immature seed texture | 50 | 2 | 0.33 | 0.11 |  | 9 | 2 | 0.50 | 0.20 |  | **54%** | **75%** |
| Easiness of pod removal | 50 | 3 | 0.77 | 0.51 |  | 9 | 3 | 0.77 | 0.49 |  | **1%** | -2% |
| Storability | 50 | 3 | 0.94 | 0.62 |  | 9 | 3 | 0.85 | 0.57 |  | -9% | -9% |
| Abbreviation: N, number of germplasms; *k*EC, number of clusters in the ECraw; *k*CC, number of clusters in the CCraw; H′, Shannon-Weaver diversity index; Nei’s, Nei’s diversity index.  aCCraw was identified using PowerCore for mixed-type phenotypic traits. bClustering analyses for quantitative traits were conducted using weighted *k*-means clustering algorithm. Phenotypic diversity richness or evenness retained in the CCraw is highlighted in bold. | | | | | | | | | | | | |

**Supplementary Table 12.** Evaluation in percentage of the trait differences between the CC and the EC of three subsets in vegetable soybean.

| **Subset** | **N** | **Property** | | | | | | | | | | | | | |
| --- | --- | --- | --- | --- | --- | --- | --- | --- | --- | --- | --- | --- | --- | --- | --- |
| **MD%**a | |  | **VD%**a | |  | **CR%**a | |  | **VR%**a | |  | **Coverage**b | |
| Observed | Complete |  | Observed | Complete |  | Observed | Complete |  | Observed | Complete |  | Observed | Complete |
| CCraw∩CCimpu | 21 | 6.16 | 5.80 |  | 46.51 | 45.65 |  | 88.90 | 90.77 |  | 153.39 | 147.52 |  | 86.53 | 97.87 |
| CCraw\CCimpu | 22 | 3.27 | 2.13 |  | 172.44 | 169.14 |  | 66.20 | 67.80 |  | 105.45 | 100.37 |  | 94.93 | 97.60 |
| CCimpu\CCraw | 15 | 4.33 | 3.40 |  | NA | 222.15 |  | 55.50 | 69.94 |  | NA | 112.88 |  | 81.27 | 98.40 |
| Abbreviation: CCraw and CCimpu, CCraw and CCimpu was identified by PowerCore with observed and complete phenotypes, respectively; CCraw∩CCimpu, intersection of CCraw and CCimpu; CCraw\CCimpu, difference of CCraw from CCimpu; CCimpu\CCraw, difference of CCimpu from CCraw; N, number of subset; MD%, mean difference percentage; VD%, variance difference percentage; CR%, coincidence rate; VR%, variable rate; Observed, computed the properties of three subsets based on ECraw and CCraw; Complete, computed the properties of three subsets based on ECimpu and CCimpu;.  aMD%, VD%, CR% and VR% were computed using all 25 quantitative traits for observed and complete data (observed plus imputed values), respectively. bCoverages were computed using all 21 qualitative traits by observed and complete data, respectively. | | | | | | | | | | | | | | | |

**Supplementary Figure 1.** The Venn diagram of the three sets of core collection (CCraw∩CCimpu, CCraw\CCimpu, and CCimpu\CCraw).


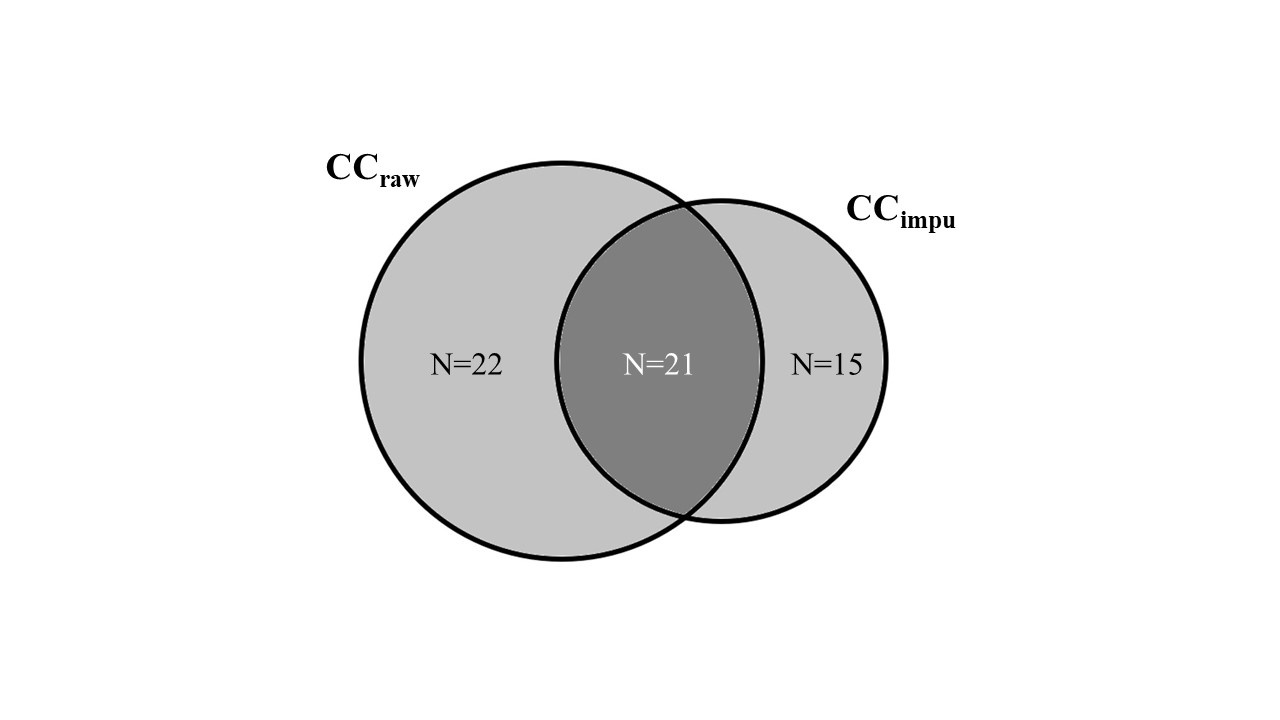

Supplement: Supplementary file 1 [file Data_Sheet_1.docx]
