# Supplementary material for: A multiple phenotype imputation method for genetic diversity and core collection in Taiwanese vegetable soybean
Source: Front Plant Sci. 2022 Sep 2;13:948349. doi: 10.3389/fpls.2022.948349 (PMC9480828; doi:10.3389/fpls.2022.948349)
Supplement: Supplementary file 2 [file Data_Sheet_1.xlsx]

## Sheet: 工作表1
Supplementary Material 1. The complete phenotypic traits of Taiwanese vegetable soybean germplasm accessions.
id	X01	X02	X03	X04	X05	X06	X07	X08	X09	X10	X11	X12	X13	X14	X15	X16	X17	X18	X20	X21	X22	X23	X24	X25	X26	X27	X28	X29	X30	X31	X32	X33	X34	X35	X36	X37	X38	X39	X40	X41	X42	X43	X44	X45	X46	X47
KG0001	8.5	7.7	6.8	1	2	1	31.35	2	3	4.7	2	33.2	1	1	1	7.2	5.5	5	2	2	5	2	28	65	3	2	1	4.3	1	1.1	2	282	2	2	9.4	4	63	1	14.7	9.7	8	2	66	2	1	2
KG0002	9.3	8.7	7.7	1	2	1	33.37	1	3	3	1	39.8	1	4	1	9.3	7.3	5	3	2	5	1	28	65	1	2	2	5.5	2	1.2	2	160	2	1	15.2	4	57	2	14.9	10.5	8.7	2	83	2	1	2
KG0003	8.1	7.7	6.4	1	2	1	32.28	2	3	2.7	2	38.6	2	4	1	9	6.3	4	3	2	4	2	26	65	3	2	1	4	1	1.1	2.2	185	2	2	12.2	2	63	2	16	10.2	8.1	2	60	2	1	3
KG0004	8.7	7.9	6.8	1	2	1	31.05	2	3	4.2	2	38.7	1	3	1	8.5	6.1	3	3	2	5	2	27	65	3	1	1	3.8	1	1.1	2	205	1	2	15.8	4	63	2	16.5	10.5	8.6	1	64	2	3	2
KG0005	8.7	8.3	7.3	1	3	3	31.48	1	2	3.3	1	25.7	3	3	1	9	6.6	2	3	1	4	1	26	65	1	2	2	4.1	1	1.2	1.9	155	1	2	8.4	2	60	2	15.2	10.2	8.2	2	72	2	3	3
KG0006	9.4	8.5	7.5	1	3	1	31.48	1	3	3.2	1	28.1	1	4	1	7.9	6.1	2	3	2	4	2	27	65	1	2	1	4.1	1	1.1	2	171	2	3	11.6	2	63	2	15.1	10	7.9	2	76	2	2	3
KG0007	8.4	8	7	1	1	2	32.25	1	2	3.3	1	25.8	3	1	1	8.7	6.3	4	2	2	3	1	30	65	1	2	1	4.3	2	1.1	1.8	155	1	2	8.8	2	65	2	15.7	10.9	9	2	60	2	3	2
KG0008	8.7	8.7	7.7	1	2	2	37.78	2	3	4.1	2	32.2	1	4	1	7.5	5.3	2	3	2	5	1	27	65	3	2	2	4.9	1	1.1	2.2	161	2	2	8.7	2	55	3	17.2	10.6	9.3	2	88	2	1	1
KG0009	7.2	8.3	7.6	1	2	1	30.99	2	3	3.1	2	31.2	2	1	1	9.1	1.4	5	2	2	4	2	26	65	3	2	2	4.1	1	1.1	2.2	140	2	2	8.3	3	64	3	17.3	10.8	8.5	1	70	2	3	2
KG0010	7.2	8.3	7.6	3	2	3	20.4	1	2	2.2	1	22.4	2	1	1	8.6	5.5	2	2	1	5	1	27	65	1	2	2	4	1	1	1.8	183	2	3	6.7	2	61	1	13.2	9.2	6.7	2	42	2	1	3
KG0011	8.3	7.7	6.6	1	2	1	31.74	2	3	3.9	2	38.3	1	3	1	8.6	6.3	5	3	2	4	3	32	65	3	3	1	4	1	1	1.9	185	2	2	9.3	2	62	2	6	1.1	8	2	60	2	1	3
KG0012	8.3	7.9	6.7	1	2	1	27.96	2	2	4	2	33	2	3	1	8.6	6.3	4	3	2	4	2	26	65	3	1	2	4.4	1	1.2	2.1	195	2	2	10.3	4	65	1	14.8	10.4	7.3	2	62	2	3	2
KG0013	8.8	8.4	7.4	3	3	3	35.42	1	3	3.2	1	23.1	2	1	1	8.1	6.3	4	3	2	5	2	28	65	1	3	2	5	2	1.2	2.2	152	2	2	7.7	2	62	2	16.5	10.5	8.7	2	70	2	3	3
KG0014	9.3	8.8	7.6	3	1	2	39.56	1	3	2.7	1	21.8	1	1	1	7.6	5.9	5	3	1	2	1	28	65	1	2	3	5.2	3	1.5	2.8	155	2	1	8.7	2	55	3	17.5	10.8	9.4	2	76	2	1	3
KG0015	8.3	8.2	6.3	2	5	3	39.64	1	3	3.3	1	28	1	4	1	8.9	6.7	2	3	1	2	1	27	65	1	1	2	4.3	1	1.3	1.7	212	1	1	7.9	3	59	2	16.5	10.9	7.2	1	71	2	1	3
KG0016	9	8.1	6.5	3	1	2	28.15	2	3	5.2	2	34.5	3	3	1	9.8	6.8	2	3	1	4	1	26	65	3	2	2	4.2	1	1.1	2.4	190	1	2	4.2	2	63	2	16.6	10.2	8.2	2	52	1	1	3
KG0017	9.2	8.4	7.5	1	3	3	34.67	1	2	3.3	1	25	2	4	1	8.3	6.1	3	3	1	4	2	27	65	1	2	2	4.9	2	1.3	2.2	152	2	3	8	2	65	2	15	9.9	7.6	2	77	2	2	3
KG0018	8.5	7.8	6.2	1	2	3	24.09	1	2	3.9	1	21	3	1	1	7	6.1	2	2	1	2	1	30	65	1	1	2	4.6	2	1.3	1.9	212	2	2	5.3	2	55	1	12.9	9.9	7	2	56	2	1	3
KG0019	9	8.8	8	1	3	3	32.81	1	2	3.2	1	22.8	1	3	1	8	6	3	3	1	4	1	26	65	1	2	2	4.6	3	1.2	2.2	161	2	3	9.4	4	63	2	16.7	11.2	9.5	2	74	2	3	3
KG0020	9.2	8.9	7.8	1	3	3	34.08	1	2	2.8	1	21.3	1	3	1	9.1	6.5	4	3	1	4	2	26	65	1	3	3	5	2	1.2	2.9	161	2	3	8.8	3	64	3	17.4	11.5	9	2	77	2	3	3
KG0021	9.3	8.5	7	1	3	3	32.38	1	3	4.2	1	21.8	1	3	1	9.5	6.7	5	3	2	4	2	26	65	1	2	2	5.1	3	1.5	2.1	195	1	2	8.8	2	60	2	17.5	11.7	9.2	2	72	2	1	2
KG0022	8.4	8	6.8	1	2	3	25.21	2	3	3.3	2	28.8	1	4	1	8.2	6.1	5	3	1	5	2	26	65	2	3	2	4.4	2	1.1	2.2	257	2	3	7.6	3	63	1	14.9	10.1	8.3	1	64	2	3	3
KG0023	8.6	8.2	7.2	2	2	1	26	2	3	2.8	2	35.6	1	4	1	7.6	5.9	4	2	1	5	2	27	65	2	1	2	4.2	2	1.1	2.2	185	1	2	13	4	63	2	15.5	9.8	8.5	2	67	2	1	1
KG0024	8.5	8.1	7.1	1	2	1	30.72	2	2	3.2	2	30.7	1	3	1	8	6	4	3	2	5	3	26	65	3	1	1	4	1	1.2	2.6	230	2	1	11	2	65	2	15.4	10.5	8.1	2	65	2	1	1
KG0025	9.4	8.8	7.5	1	3	3	33.94	1	3	2.2	1	20.2	1	3	1	8.8	6.3	2	3	1	5	2	26	65	1	2	2	5.1	1	1.2	2.1	150	2	1	7.7	2	60	2	16.4	11.1	9.1	2	72	2	1	3
KG0026	9.3	8.7	7.7	1	3	3	33.58	1	2	2.7	1	22.7	2	1	1	7.7	6.1	3	3	2	5	2	26	65	1	1	2	5	2	1.3	2.1	183	1	2	8.7	2	63	2	15.7	10.9	8.2	2	67	2	1	2
KG0027	8.5	8.1	6.5	2	2	3	22.51	2	3	5.2	2	30	1	4	1	10.1	7.8	4	3	2	4	1	28	65	3	1	1	4.1	1	1.1	2.2	230	1	3	7.3	2	65	1	11.3	9.8	7	2	55	2	1	3
KG0028	9.1	8.9	8.1	1	3	3	33.31	1	2	3.3	1	29	1	4	1	9.7	7.2	3	3	1	4	1	27	65	1	1	2	4.9	2	1.2	1.8	175	2	3	9	4	60	1	14.1	9.7	8.1	2	70	1	1	3
KG0029	9.2	8.3	7.3	1	3	3	32.09	1	3	4.6	1	21.7	2	1	1	8.6	6.1	5	3	2	5	2	28	65	1	3	2	5.5	2	1.3	1.8	171	1	2	7.7	2	63	2	15.3	10.3	9.1	2	75	2	1	2
KG0030	8.5	8.4	7.5	1	3	3	30.32	1	2	4.8	1	27.7	3	3	1	9.6	6.6	2	3	2	4	1	28	65	1	2	3	4.9	2	1.2	2.5	150	2	2	8	2	60	1	11.9	10.1	8.5	2	62	2	1	3
KG0031	8	7.4	5.7	2	3	3	16.34	2	3	4.5	2	17.3	1	4	1	7.4	5.3	2	3	2	5	2	26	65	3	1	1	4.1	1	1.2	2.4	255	1	2	4.3	2	60	1	12.4	8.5	6	2	60	2	3	2
KG0032	8.6	7.8	6.6	3	2	2	25.37	2	2	3.7	2	28.7	2	3	1	9.1	6.5	2	2	2	3	1	26	65	1	1	2	5.1	2	1.1	2.3	185	1	3	9.3	2	60	1	14.8	9.5	7.5	1	57	2	3	1
KG0033	8.7	8.2	7.1	1	2	3	30.07	2	3	3.7	2	28.7	3	1	1	8.9	6.4	5	3	1	5	3	27	65	3	3	3	4.5	2	1.1	2.8	205	2	2	7	2	63	2	15	9.8	9.2	2	75	2	1	3
KG0034	9.2	8.6	7.6	1	3	3	33.36	1	2	3.3	1	20.2	1	3	1	9.2	6.6	2	3	1	4	2	28	66	1	1	1	4.5	3	1.2	1.1	170	1	2	8	2	63	1	14.9	9.8	7.9	2	85	2	1	1
KG0035	8.2	8	7	1	2	3	28.52	2	3	3	2	25.7	3	3	1	8	6	4	3	2	5	3	28	65	3	3	3	4.9	2	1.3	2.8	220	2	1	5	2	63	2	15.7	9.9	8.3	2	70	2	1	1
KG0036	8	7.3	5.9	2	1	3	21.21	1	3	3.3	1	26	2	3	1	8.7	6	5	3	2	2	1	31	65	1	1	2	5.1	3	1.4	1.5	210	1	2	5.3	2	57	1	13.5	9.5	6.2	2	50	2	1	3
KG0037	8.7	8.8	8	1	3	3	36	1	2	3.3	1	25.8	1	1	1	8.5	6.7	2	3	2	4	1	26	65	1	1	1	4	1	1.1	2	171	1	2	11.6	4	63	2	15	11	8.4	2	70	2	2	3
KG0038	9.3	8.7	7.8	1	3	3	4.24	1	2	4.3	1	23.2	3	1	1	8.1	6.2	4	3	1	2	2	27	65	1	2	1	4.9	2	1.2	2	140	1	2	8.6	3	63	2	15.7	10.2	8.6	2	71	2	1	2
KG0039	8.4	7.8	5.9	1	2	3	21.9	1	3	5.5	1	23.7	3	3	1	8.3	5.7	5	3	2	4	2	32	65	1	3	3	5.1	2	1.3	1.9	185	1	2	6	2	60	1	12.7	9	6.8	2	50	2	1	2
KG0040	9.1	8.6	7.3	1	3	3	30.46	1	2	3.3	1	24	3	1	1	8.4	5.9	4	3	1	4	2	27	65	1	3	2	4.6	1	1.1	1.8	185	2	2	5.3	3	63	2	15.5	10.1	8.3	2	64	2	1	2
KG0041	9.2	8.8	7.8	1	3	2	35.57	1	2	3.7	1	24.2	3	3	1	8.3	5.3	2	3	2	4	1	28	65	1	2	2	5.1	1	1.2	2.5	156	2	2	7.4	3	65	1	14.4	10.1	7.3	2	80	2	1	1
KG0042	9.5	8.8	7.8	1	3	3	34.94	1	3	3	1	23.4	1	1	1	8.7	6.2	4	3	2	2	2	26	65	1	2	1	4.9	2	1.2	2.2	170	1	1	10	3	63	2	17.4	11.3	9.4	2	70	2	1	2
KG0043	7.9	6.9	5.6	2	2	3	19.21	2	3	4	2	36	3	3	1	8.2	6.1	5	2	2	5	3	28	65	2	3	2	4.2	1	1	1.5	265	1	2	8.7	4	63	1	13.4	8.8	6.2	2	40	2	3	2
KG0044	9.4	8.9	7.9	1	3	3	35.02	1	2	3.2	1	22.4	3	1	1	8.8	6.8	4	3	1	5	2	28	65	1	2	3	5.4	3	1.4	2.6	150	2	1	6.2	2	63	2	16.2	10.4	8.2	2	80	2	1	3
KG0045	8.6	8.3	7.5	1	2	3	29	2	3	3.7	2	35.6	1	4	1	8.8	6.2	2	2	2	4	2	25	65	2	2	2	4.4	3	1.2	2.3	156	2	2	10.4	4	63	2	15.7	9.9	8.5	2	85	2	3	1
KG0046	9.3	8.9	7.9	1	2	3	34	1	2	3.1	1	23.6	1	4	1	8.2	6.1	4	3	1	4	2	28	65	1	1	2	5	3	1.2	2	155	2	2	8.6	3	60	3	17.2	10.7	8.7	2	80	2	1	3
KG0047	8.5	8.1	7.3	1	2	3	30.55	2	2	4.6	2	37.7	3	4	1	8.3	5.9	4	3	2	5	2	26	65	3	1	2	4.6	1	1.2	2.3	282	2	1	8.3	4	60	2	16.2	10.5	8.2	1	60	2	2	2
KG0048	8	7.1	5.7	2	3	3	19.65	2	3	4.2	2	25.4	3	3	1	7.3	5.1	5	3	1	4	2	26	65	3	2	2	4.3	1	1.1	2	205	1	3	7.6	2	60	2	16.3	10.3	8.4	2	66	2	3	2
KG0049	8.9	8.7	7.9	1	3	3	34.42	1	2	3	1	30.8	1	1	1	8.5	6.7	2	3	2	4	1	27	65	1	1	2	4.4	2	1.2	2.2	177	2	1	10.2	4	63	1	14.8	10.4	8.7	2	66	1	1	3
KG0050	9.4	8.9	7.8	1	3	3	37.46	1	2	4.5	1	21.6	3	1	1	9.3	6.8	5	3	2	2	2	28	65	1	3	3	5.4	2	1.3	2	205	2	1	6.2	4	63	2	15.7	10.7	8	2	6.8	2	1	1
KG0051	8.82	8.16	7.24	3	3	3	31.1	1	3	3	1	27.2	2	1	1	9.6	7	5	3	1	5	2	30	65	1	3	2	5.2	3	1.3	2.2	170	1	2	8.3	2	62.5	2	15.5	11.6	8.1	4	90	1	3	1
KG0052	9.12	8.11	7.24	2	3	1	32.95	1	3	5	2	29.8	2	1	1	9.6	6.6	5	2	1	4	1	27	65	1	3	3	4.2	2	1.2	2.6	175	1	2	14	4	61	2	14.3	10.5	7.9	2	57	2	3	1
KG0053	9.05	8.45	7.85	3	3	3	36.62	1	3	4.7	2	26.6	3	1	2	10	7.3	5	2	1	4	1	27	65	1	3	3	5	2	1.3	2.2	150	1	1	9	4	52	2	17.9	10.6	8.6	2	64	2	3	2
KG0054	8.64	8.57	8.04	3	3	4	36.85	1	2	4.5	2	24.8	3	1	2	10.2	8.5	4	3	1	1	1	27	67	1	3	3	4.3	1	1.1	2.8	150	1	2	13.3	4	4.8	1	14.5	11.4	9.1	2	58	2	1	1
KG0055	8.33	8.21	7.39	1	3	3	33.97	1	2	5.2	2	28.1	3	1	2	10.5	8.7	5	2	1	4	1	26	65	1	3	2	4.4	2	1.1	1.8	265	1	2	6.8	4	55	1	15	10.3	8.1	2	70	2	3	1
KG0056	8.36	8.21	7.52	1	3	3	34.62	1	3	3.2	2	23.8	3	1	1	9	6.7	5	3	1	5	1	28	65	1	3	3	4.9	2	1.1	2.2	170	2	2	7.8	3	52	3	16.4	10.8	9.1	2	70	2	1	1
KG0057	8.55	8.27	7.24	1	3	3	34.92	1	2	4.6	2	27.9	2	1	1	9.8	7	4	3	1	4	1	26	65	1	2	2	4.3	3	1.3	2.2	160	1	2	8.3	2	61	3	14.9	10.4	8.7	4	85	2	1	3
KG0058	8.76	8.15	7.33	3	3	3	33.58	1	3	3.3	2	27.9	2	1	2	9.9	7.5	5	3	1	4	2	26	65	1	3	2	4.1	2	1.2	2.2	150	1	2	6.7	2	65	3	16.4	10.1	8.2	2	70	1	2	3
KG0059	8.5	7.55	6.41	3	3	3	27.58	1	2	3.1	2	27.9	3	1	1	8.75	5.8	4	2	1	4	1	26	65	1	3	2	4.6	3	1.3	1.8	165	1	2	10.7	4	52.5	2	17.3	10	9.1	2	80	2	3	1
KG0060	8.36	8.08	7.16	3	3	3	32.88	1	3	7	2	32.5	2	1	2	10.4	7.1	5	2	1	4	1	27	65	1	3	2	4	2	1.1	2.3	152	1	2	10.5	3	63	3	16.2	12	8.1	2	60	1	3	3
KG0061	9.52	8.26	6.86	3	3	3	36.13	1	3	5.5	2	26.5	2	1	2	10.5	8	5	2	1	4	1	27	65	1	3	2	4.3	3	1.2	1.7	180	1	3	5.3	3	48	3	17	11.4	9.4	2	70	2	3	3
KG0062	9.24	8.67	7.65	1	3	3	35.71	1	2	4.7	2	28.5	2	1	2	11.2	8.3	5	2	1	4	1	27	65	1	3	2	4.9	2	1.2	2	175	1	2	6.2	4	61	3	15.7	10.6	8	2	60	1	2	2
KG0063	8.72	8.08	7.04	1	3	3	35.79	1	3	4.2	2	28.5	2	1	1	9.6	7.2	5	3	1	5	2	28	65	1	2	2	4.4	3	1.2	1.9	150	1	2	11	2	62	2	14.7	9.9	8.7	4	85	1	1	3
KG0064	8.3	7.97	6.89	2	2	3	27.78	2	2	5.5	3	36.9	2	1	2	10.8	8	5	2	1	5	2	27	65	3	3	2	4.2	1	1.3	2.1	177	2	2	10	4	60	3	15.6	11.5	7.2	2	90	1	3	3
KG0065	8.74	8.75	7.84	1	3	3	35.09	1	2	4.8	2	27.3	2	1	2	10	8.4	5	3	1	4	1	27	65	1	2	3	5.2	3	1.1	2.1	157	1	2	8.8	4	57	2	15	10.3	8.1	2	65	2	3	3
KG0066	8.88	8.38	7.61	2	3	3	35.49	1	2	3.1	2	28.1	3	1	1	9.3	6.7	4	2	1	5	1	26	65	1	2	3	5.1	2	1.3	2.8	188	1	2	10.5	4	61	3	15.9	11.4	7.9	2	71	2	3	2
KG0067	8.82	8.33	7.15	2	3	3	35.25	1	2	3.9	2	26.7	3	1	1	9.4	6.5	5	3	1	4	2	27	65	1	3	3	5	2	1.2	2.3	173	2	2	5.3	4	63	2	12.8	10.8	8.1	2	72	2	1	3
KG0068	8.75	8.16	6.88	1	3	3	32.74	1	2	3.9	2	30	2	1	2	9.6	7.5	5	3	1	4	1	27	65	1	3	2	4.3	3	1.1	1.5	183	1	2	8.7	3	63	2	15	10.8	8.3	4	64	1	1	3
KG0069	8.91	8.76	7.86	1	3	2	36.74	1	2	3.7	2	28.3	3	1	1	9.7	7.1	5	3	1	3	1	26	65	1	3	3	4.8	2	1.2	2.8	155	2	2	7	3	63	3	13.7	11.7	8.7	2	70	2	2	3
KG0070	8.26	7.97	7.11	2	2	3	29.9	2	2	3.8	3	36.7	2	3	2	10.7	7.6	5	3	1	4	2	27	65	3	2	2	4.4	1	1.1	2.2	205	2	2	10.5	3	58.5	2	13.5	10.8	6.7	2	65	1	1	3
KG0071	8.68	8.29	7.3	1	2	3	32.23	2	3	3.7	2	35.1	3	1	1	9.5	6	4	2	1	4	2	31	71	3	3	2	4.9	1	1.3	2.2	153	2	2	10.3	2	55	2	16.4	9.7	8.5	2	64	1	1	3
KG0072	8.22	7.8	6.39	2	2	3	28.37	2	3	4	3	37.7	3	1	2	10.5	5.6	5	2	1	4	2	30	71	2	3	3	4.9	1	1.4	2.2	170	2	2	4.3	2	63	2	13.7	9.8	6	2	40	1	1	2
KG0073	8.13	7.77	6.73	2	2	3	30.75	2	2	3.8	3	38.1	2	1	2	10.7	7.7	5	3	1	3	2	32	71	2	2	3	4.9	1	1.2	2.4	190	1	2	11.6	2	51	1	11.5	16.7	9	4	75	2	1	3
KG0074	7.97	7.44	6.25	3	2	3	27.56	2	3	4.8	3	34.8	2	1	2	10.3	7.8	5	3	1	4	1	27	65	2	2	1	4.2	2	1.2	1.5	220	1	2	8.3	2	52	1	16.3	10.6	8	4	73	1	1	3
KG0075	7.5	7.25	5.84	3	2	3	24.07	1	2	2.4	2	25.46	3	1	1	9.9	5.8	4	3	1	4	1	28	65	1	2	2	4.8	3	1.4	2.2	183	1	2	6.8	3	60	2	15.7	11	7	2	72	2	3	2
KG0076	7.57	6.77	5.29	4	2	3	21.36	2	3	3.2	3	35.4	1	3	1	10	6.7	4	3	1	3	2	28	65	2	3	1	4.9	1	1.1	2.4	220	1	3	9.4	2	63	1	15.4	8.8	6.6	4	54	2	3	1
KG0077	8.64	7.64	6.26	4	2	2	27.71	2	2	3	2	32.9	1	3	2	9.9	7.3	2	3	1	4	1	28	65	2	2	2	5	3	1.2	2.4	212	1	2	10.2	2	53	1	15.5	10.4	9.5	2	70	2	1	3
KG0078	8.21	8.12	6.67	2	2	2	28.22	1	3	3	2	31.2	3	1	1	7.3	5.3	4	3	1	5	1	26	65	1	1	2	4.1	1	1.2	1.9	190	1	2	5	4	55	2	15	9.9	7.8	2	68	2	1	3
KG0079	8.58	7.89	6.86	1	2	3	29.58	2	2	2.8	3	31.5	3	3	1	8.8	6	4	2	1	3	1	26	65	2	1	2	5.1	1	1.1	2.3	220	2	2	12.3	2	65	1	17	10.3	6.2	4	76	1	3	1
KG0080	7.68	6.91	5.46	4	2	3	21.29	2	3	3.1	3	35.1	1	3	1	10.1	6.7	3	3	1	4	2	28	65	2	2	2	4.9	3	1.2	3.1	183	1	3	14.7	2	60	1	15	8.7	7.3	4	70	1	1	3
KG0081	8.33	7.7	6.26	2	2	2	27.61	1	2	1.7	2	26.5	1	1	1	8.3	5.7	4	2	1	3	2	26	65	1	1	1	4.3	2	1.2	2	150	1	2	10.5	4	57	3	15.4	10.2	8.6	1	72	2	1	2
KG0082	8.46	8.01	6.94	4	2	3	27.91	2	2	4.3	3	36.8	2	1	2	10.1	8.3	5	3	1	3	2	32	67	3	2	1	4.8	2	1.1	2	173	2	2	15.8	2	62	2	17.4	10	6.7	4	82	1	1	1
KG0083	7.95	7.39	6.06	2	2	3	23.96	1	2	2.4	3	27.6	3	1	1	9.1	6.7	4	2	1	3	1	26	65	1	1	2	4.5	2	1.2	2.1	205	1	2	12.2	4	52.5	2	15.4	10.3	6.2	2	60	2	3	2
KG0084	8.57	7.9	6.95	3	2	2	34	2	2	3.3	3	31.2	2	1	1	7.6	5.6	4	3	1	3	1	28	65	3	2	1	5	1	1.1	2	188	1	2	13.3	2	63	1	16.7	10.1	8	4	74	1	1	2
KG0087	9.55	9.22	7.79	1	1	1	42.8	1	3	4	2	31	3	1	1	8.1	6.3	5	2	1	4	1	26	65	1	3	3	4.8	2	1.1	3.3	162	2	2	18.4	4	63	3	14.5	9.9	9.1	2	60	2	1	3
KG0089	9.84	9.24	7.5	1	3	2	45.63	1	2	4.4	2	31.7	3	1	1	9.5	5.9	4	2	1	3	1	26	67	1	2	3	4.2	2	1.2	2.8	161	1	2	8.6	3	65	3	15.7	12	8.6	2	85	2	3	3
KG0090	8.67	8.06	7.42	3	2	2	35.35	2	3	2.7	2	35.2	2	1	1	9.8	7.1	5	3	1	4	1	28	65	3	2	1	5.1	2	1.3	2	220	1	2	16.7	2	59	1	15.5	10.3	8.2	2	62	1	1	2
KG0091	8.39	7.73	6.89	3	2	2	32.37	1	2	2.7	3	27.6	1	1	1	9.8	6.8	5	3	1	3	1	26	65	1	2	3	5.4	3	1.4	2.7	173	1	2	10.3	4	65	2	16.6	10.3	7	2	66	2	2	1
KG0092	9.27	8.65	7.16	3	2	2	32.37	2	2	2.2	2	28.5	1	1	2	10.9	7.8	5	3	1	3	1	28	65	3	2	1	5	2	1	3.1	190	2	2	10	2	65	3	15.7	9.9	8.4	2	64	1	1	3
KG0093	8.54	8.13	7.42	3	2	3	35.85	2	2	3.5	2	25.2	1	1	2	9.3	8.4	5	2	1	3	1	27	65	3	1	1	5.1	2	1.1	2.1	282	1	2	16	3	63	2	17.5	16.7	8.4	1	47	2	1	2
KG0094	9.09	8.31	7.52	3	2	3	35.72	2	2	3.2	2	35.2	3	3	2	11.7	9.6	5	3	1	3	1	30	65	3	2	2	5.1	3	1.3	2.4	150	2	2	19.3	2	56	3	17	9.9	7.8	2	95	1	3	1
KG0095	8.54	8.16	6.92	1	2	2	43.46	1	2	4	3	34.4	2	1	2	10.7	7.7	5	2	1	3	1	26	65	1	2	1	4.6	2	1.3	1.8	188	1	2	8.3	4	61	2	16.4	8.7	6.2	2	60	1	1	1
KG0096	9.17	8.7	7.13	1	2	2	37.39	2	3	4.1	3	34.9	1	1	2	9.7	8	5	2	1	3	1	27	65	2	2	1	5	3	1.1	2.1	190	1	2	11.6	2	52.5	2	16.2	10.3	7.9	2	72	2	1	1
KG0097	8.71	8.56	7.79	1	3	3	37.88	1	2	5	3	30.1	1	1	2	10.1	7.8	5	2	1	3	1	26	65	1	2	1	4.2	1	1.2	1.9	155	2	1	12.2	4	63	3	17.8	11.3	9	2	60	2	1	2
KG0098	8.76	8.59	7.68	1	2	2	39.89	2	2	3.3	3	34	1	1	2	10.2	8.2	5	2	1	3	1	26	65	3	2	2	5.4	2	1.2	3.1	205	1	2	17	3	61	1	15.9	12	8.2	2	65	1	1	2
KG0099	8.93	8.57	7.62	1	3	3	38.65	1	2	3.7	3	29.7	2	1	2	11.4	8.7	5	3	1	4	1	27	66	1	2	2	4.1	2	1.1	2.1	180	2	2	8.7	3	61	3	15.8	10.1	7.5	2	58	1	1	3
KG0100	8.75	8.54	7.66	1	3	3	35.58	1	2	4.5	3	33.1	3	1	2	10.7	6.8	5	2	1	4	1	27	65	1	3	2	5	1	1.1	1.9	168	1	2	6.8	4	62	2	16.4	10.6	7.9	2	70	1	1	2
KG0101	10.8	9.7	7.1	4	3	2	46	1	2	3.7	1	35.3	2	1	2	12.9	8.2	5	3	1	4	1	28	65	1	2	3	5	3	1.3	2.4	212	1	2	14.8	4	58	2	15.7	11.3	7.8	2	60	2	3	3
KG0102	8.3	8	7	1	3	3	37	1	3	3.9	1	46.5	2	1	1	9.8	6.9	5	2	1	4	2	26	65	1	3	2	4.7	2	1.2	2.5	207	1	2	7.5	2	58.5	2	14.1	9.8	7.7	2	60	2	3	1
KG0103	9.4	8.7	7.9	3	1	2	37	2	2	3.2	2	42	2	1	2	10.2	7.2	2	2	1	4	2	26	65	2	2	2	4.7	2	1.2	2.7	175	1	2	4.5	2	51.5	3	16.7	10.9	9	2	70	2	2	2
KG0104	8.4	8	7.7	1	3	3	35	1	2	3.7	1	35.5	3	1	1	10.4	7.7	2	3	1	5	1	26	65	1	2	1	4.4	1	1.1	1.8	257	1	1	10	4	45	2	14.8	10	8.6	2	60	2	1	2
KG0105	9.1	8.7	7.9	1	3	3	40	1	2	2.4	1	35	2	1	2	8.9	7.5	2	3	1	1	1	27	65	1	3	2	4.5	1	1.1	1.9	220	1	1	5	2	62.5	2	14.2	11	8	2	70	1	1	2
KG0106	8.9	8	6.9	3	3	2	36	1	2	3.2	1	52	2	1	3	10.1	7.5	5	3	1	5	3	28	65	1	3	1	4.4	2	1.2	1.9	150	1	1	12.5	4	75	3	16.6	10.5	8.9	2	65	1	2	2
KG0107	8.7	8.3	7.4	1	3	3	34	1	2	3.2	1	45	2	1	1	11.3	7.8	3	3	1	3	2	28	65	1	2	1	4.3	1	1	1.5	170	1	2	9	3	50	2	15	10.3	8.2	2	80	2	2	3
KG0108	9.1	8.8	8.2	1	3	3	37	1	2	3.8	1	50.5	3	1	3	10.7	7.9	2	2	1	1	1	26	65	1	3	2	4.6	1	1	1.4	197	1	1	8.8	4	60	2	14.3	9.8	7.9	2	70	2	1	1
KG0109	9	9	7.9	1	3	3	37	1	2	3.3	1	34	2	1	2	10.5	8	3	3	1	4	1	26	65	1	2	2	4.6	1	1.1	1.9	210	1	3	5.6	2	60	2	15	10.8	7.8	2	70	2	3	3
KG0110	9.4	8.4	7.2	3	3	3	38	1	2	3.3	1	37.2	3	1	3	10.4	7.6	2	3	1	5	3	26	65	1	3	2	4.7	1	1.1	1.9	190	1	1	10.5	4	55.5	2	15	10.2	7.8	2	70	1	2	1
KG0111	9.3	8.6	7.4	1	3	3	38	1	2	3.3	1	39.5	1	1	3	10.4	7.1	5	2	1	4	3	26	65	1	3	2	4.8	2	1.2	2	170	1	1	16.8	4	61	2	15.1	10.1	7.8	2	75	1	3	1
KG0112	9.2	8.2	7.4	1	3	3	38	1	2	4.2	1	43.5	2	1	2	11.6	8.6	3	2	1	4	3	26	65	1	2	2	4.8	3	1.3	2.5	205	1	1	12.3	4	61	2	15.4	10.1	8.2	2	70	1	3	2
KG0113	9	8.8	7.9	1	3	3	40	1	3	3.3	1	64.6	1	1	2	11.5	8.6	4	3	1	4	1	27	65	1	2	1	3.8	1	1.1	1.2	190	1	1	18.4	4	62.5	2	14.5	10.5	8.3	2	65	1	1	2
KG0114	9	8.7	7.6	3	1	3	39	1	2	4.7	1	38.8	3	1	3	11.2	8.2	4	3	1	4	1	26	65	1	2	3	5.2	2	1.2	2.4	212	1	1	11.8	3	52.5	2	15.8	11.1	9.1	2	60	2	2	3
KG0115	7.1	6.2	5.2	3	2	3	17	1	3	3.7	1	58	2	4	2	13	7.9	2	3	2	5	3	28	65	1	3	2	4.7	1	1	1.8	145	1	2	7.3	3	57.5	1	11.5	7.7	6.2	2	80	1	3	1
KG0116	8.8	8.5	7.2	1	3	2	34	1	2	3.2	1	37.5	2	1	1	10.7	7.2	3	3	1	4	1	26	65	1	3	2	4.6	1	1.1	2.2	150	1	3	4.3	2	55	2	15.1	10.3	8.3	2	65	2	3	2
KG0117	8.4	7.8	6.5	3	1	2	33	1	2	3.3	1	40.8	2	1	1	12.2	7.5	2	3	1	5	1	28	65	1	2	3	5.2	3	1.3	2.3	282	1	2	15	3	55	1	13.7	9.5	7	2	60	2	1	1
KG0118	9.1	8.4	6.9	3	3	3	37	1	2	2.8	1	45	2	1	2	10.5	7.4	4	3	1	4	3	27	65	1	2	1	4.3	1	1	1.5	190	1	1	9	4	62.5	2	15.4	10	8	2	70	1	1	2
KG0119	9.4	8.7	7.2	3	1	2	43	1	2	5.2	1	37.3	3	1	3	11	8.3	3	3	1	4	1	26	65	1	3	2	4.7	1	1.1	2.2	212	1	3	11	3	60	1	13.7	10.4	8.5	2	65	2	3	2
KG0120	8.9	8.4	7.6	1	3	3	38	1	2	3.1	1	37.2	3	1	2	10.8	7.9	3	3	1	3	1	28	65	1	3	2	4.7	1	1.1	1.9	152	1	1	10	4	50	3	17.5	11.7	8.6	2	75	2	3	1
KG0121	10.3	8.6	6.5	4	3	2	40	1	2	4.5	1	43.5	2	1	3	12	9.5	4	2	1	4	3	28	65	1	3	2	4.8	3	1.3	2.5	195	1	2	12.3	4	57.5	3	16.5	11.6	7	2	70	2	3	1
KG0122	8.9	8.3	7.4	1	3	3	37	1	2	3.1	1	34	3	1	2	11.6	8.3	4	3	1	4	1	28	66	1	3	2	4.8	1	1.1	1.9	190	1	2	6.8	2	60	3	16.5	11.6	7	2	70	2	3	3
KG0123	10.2	9	7.8	3	3	3	51	1	2	3.1	1	42.3	2	1	2	11.5	8.6	3	3	1	2	2	26	66	1	1	3	5.3	3	1.3	3.1	195	1	1	13	3	55	2	17.5	12.4	8.8	4	76	2	1	3
KG0124	9.9	9.1	7.5	3	2	3	48	2	2	5	2	42.2	2	1	3	10.8	8.3	3	3	1	2	2	26	66	2	1	3	5	3	1.3	3.3	155	1	2	14.8	2	57	3	17.6	12	7.5	4	90	2	3	2
KG0125	10.4	9.2	8.8	1	3	3	51	1	2	3.2	1	36.3	2	3	3	11.3	8.2	4	3	1	2	3	26	66	1	3	2	4.7	1	1.1	1.8	162	1	1	8.3	2	56	3	18	12.2	9.7	4	88	1	1	2
KG0126	8.8	8.5	7.9	1	3	3	36	1	2	2.4	1	38	2	3	1	9.6	7.2	3	3	1	4	1	26	67	1	2	2	4.9	1	1.1	1.9	220	1	3	8	2	59	1	13.8	9.6	8.1	2	59	1	2	3
KG0127	9.4	8.5	7.1	3	2	2	40	2	2	3.1	1	40.8	2	1	2	10.8	8.8	5	3	1	2	2	26	65	1	3	3	5.2	3	1.3	2.2	220	1	2	15	3	50	2	15.9	11	7.9	2	6.2	1	1	2
KG0128	7.6	7.2	6.4	1	4	3	22	1	2	1.7	1	37	2	1	1	11	7.1	2	2	1	3	3	31	65	1	2	3	5	1	1.1	2.2	252	1	1	7.8	2	55	1	12.7	8.7	7	2	47	1	2	2
KG0129	8.3	7.7	6.4	3	2	2	28	1	2	3.3	1	37.3	2	1	1	9.7	6.8	2	2	1	4	1	26	66	1	2	1	4.3	2	1.2	2.1	220	1	2	15.8	2	54	2	14.4	10.2	7.8	2	62	2	1	2
KG0130	8.6	8.3	7	1	3	3	36	1	2	3.2	1	44.5	1	3	2	10.8	7.7	4	2	1	4	1	26	66	1	2	2	4.8	2	1.2	2.6	185	1	2	9.5	2	61	3	16.2	10.3	8.1	2	64	2	2	2
KG0131	9	7.6	6.8	3	1	2	32	2	2	3.3	1	39.5	1	1	1	11.2	7.6	2	3	1	4	2	28	66	1	1	2	4.9	2	1.2	2.6	250	1	2	11.8	2	55	2	14.3	10	8	2	56	1	1	2
KG0132	7.3	6.8	5.9	1	2	2	21	2	2	3.1	2	36	3	1	1	11.8	5.4	1	2	2	4	2	25	66	2	1	1	4.3	1	1.1	1.7	250	2	3	8.5	2	57	1	13.5	9	6.9	2	38	2	3	2
KG0133	9.4	8.7	7.3	3	1	2	40	1	2	3.7	1	41	2	1	2	11	7.8	2	3	1	2	2	28	67	1	3	1	4.4	1	1.1	2.1	190	1	2	9.5	2	49	2	15.6	10.9	8.2	2	60	2	1	3
KG0134	9.6	8.3	6.7	4	1	3	37	2	2	4.8	2	43	2	4	3	13.4	10.4	4	3	1	4	2	31	70	2	3	2	4.5	2	1.2	2.2	230	1	2	17	2	43	3	17	10.8	7.4	2	60	2	3	2
KG0135	8.8	8	7.1	1	1	2	36	1	2	4.5	1	37.6	2	1	2	12.4	10.4	3	3	1	4	1	28	67	1	3	1	4.3	2	1.2	2.1	235	1	3	16.2	3	53	2	15.4	10.4	8	2	60	1	3	2
KG0136	9	7.9	6	4	2	2	35	2	2	4.1	1	39.3	3	3	2	11.3	8.5	2	3	1	4	1	28	67	1	3	3	5.2	2	1.2	3.1	265	1	3	8.8	2	52	2	15.7	10.3	7	2	54	2	3	3
KG0137	8.8	8	7.1	3	1	2	38	2	2	2.7	2	34	3	4	2	11.1	7.3	2	3	1	2	1	28	67	2	2	2	4.8	1	1.1	1.9	230	1	2	6.8	2	4.8	3	16.1	10.1	8.2	2	58	2	1	3
KG0138	9.6	8.8	7.1	1	1	2	40	2	2	4.2	2	43	2	4	2	11.2	8.3	4	3	1	3	1	28	67	2	3	2	4.5	2	1.2	2.4	205	1	2	8	2	55	3	16.4	10.9	8.1	2	72	1	3	2
KG0139	10.8	8.9	8	4	3	3	48	1	2	3.1	1	39.4	2	3	3	10.8	8.3	3	3	1	3	3	32	71	1	1	2	4.5	2	1.2	2	185	1	1	15	3	50	3	18	11.3	8.2	2	74	2	1	1
KG0140	9.9	8.5	7.3	3	3	3	43	2	2	4.3	2	56	2	3	3	10.8	7.9	2	3	1	2	3	26	67	2	3	3	5.1	2	1.2	2.7	180	1	1	15	3	58	3	18.1	12.3	8.9	4	78	1	2	2
KG0141	8	7.2	5.9	3	1	3	25	2	2	4.5	2	47.3	2	1	2	11.5	8	2	3	1	4	1	27	65	2	2	2	4.3	3	1.2	2	220	1	2	11	3	54	1	13.4	8.9	6.7	4	6.2	1	3	1
KG0142	8.5	8	6.9	1	1	3	32	2	2	3.2	2	35.5	2	3	2	11.3	7.6	2	3	1	4	3	25	67	1	1	1	4.4	1	1.1	1.8	207	1	1	10	2	57.5	2	15.6	10.4	8	2	64	1	1	3
KG0143	10.1	9.1	7.2	3	3	2	44	1	2	2.2	1	36.3	2	1	2	12.6	9	4	3	1	2	1	27	67	1	2	1	4.6	1	1.1	1.7	160	1	1	8.8	2	53	3	17.9	12.4	8.8	2	83	1	1	3
KG0145	7.5	7.2	5.9	1	1	2	29	1	2	4.4	1	37.3	1	3	2	10.4	7.5	2	2	1	4	1	26	67	1	1	1	4.3	2	1.2	2.1	195	1	2	15.5	3	51.5	3	16.1	10.8	7.4	2	65	2	3	1
KG0147	9.2	8.5	7.1	3	3	2	38	1	2	2.7	1	36.8	3	1	2	11.6	8	3	3	1	4	3	28	68	1	2	2	4.8	3	1.3	2.4	220	1	1	15.8	4	53	2	15.6	10.1	7.9	1	58	1	1	3
KG0148	9.2	8.8	7.3	3	3	4	37	1	2	3.1	1	41.3	1	1	2	10.5	7.5	2	3	1	4	1	27	68	1	2	1	4.4	2	1.2	1.9	225	1	2	15	4	56	2	15.6	10.3	7.5	2	60	1	2	1
KG0149	8.9	8.7	7.1	1	3	4	35	1	2	3.3	1	35.6	2	1	1	11.1	8	2	3	1	3	1	28	69	1	2	3	5	3	1.3	2.5	235	1	2	13.2	2	55	2	14.9	10.2	7.8	2	58	1	3	1
KG0150	9.1	8.6	7.4	3	1	2	37	1	2	3.3	1	36.3	3	1	2	12.3	8.3	2	3	1	3	1	32	70	1	3	2	4.5	1	1.1	1.9	210	1	2	8.3	2	51	3	16.5	11.7	8.2	2	60	1	1	2
KG0151	9.35	9.09	7.89	1	3	3	36.2	1	2	3.2	1	44.3	1	3	2	9.8	7.6	3	3	1	5	1	27	65	1	3	2	4.4	3	1.3	1.9	165	1	2	19.3	4	62	1	15.3	10.8	7.2	2	90	1	3	2
KG0152	8.89	8.71	7.44	1	3	2	36.9	1	2	3	1	52.3	2	4	2	9.6	7.2	3	3	1	5	1	26	65	1	3	2	4.6	2	1.2	2.8	173	1	2	17.7	4	56.5	2	14.1	9.4	6.7	2	78	1	3	2
KG0153	10.67	8.78	6.76	3	3	2	42.7	1	2	5	1	62.3	3	1	2	10.5	8.2	4	3	1	5	1	27	65	1	3	2	1.3	2	1.2	2.9	160	1	2	20.7	4	55	3	16.2	11.3	8.5	4	85	1	3	3
KG0155	10.33	8.44	7.33	3	2	3	38.6	1	2	3.3	1	53.3	3	4	3	10.8	7	3	3	1	5	1	32	71	1	3	2	4.4	2	1.2	1.9	157	1	2	17	4	52	3	13.2	8.3	6	2	82	1	3	2
KG0156	10.98	9.26	7.48	3	3	2	45.7	1	2	2.4	1	37.7	2	1	2	11.4	8	4	3	1	4	2	28	65	1	3	3	5.1	3	1.4	2	155	1	1	11.7	2	45	2	16.3	10.4	8.6	1	80	2	1	2
KG0157	11.24	9.19	7.06	3	3	2	44.1	1	2	3.7	1	55.3	3	4	2	10.5	8.4	2	3	1	4	2	27	65	1	3	2	4.2	2	1.1	2	156	1	1	14.7	4	52.5	2	16.7	16.7	8.4	2	86	1	1	3
KG0158	9.06	8.43	6.61	2	3	2	32.5	2	2	3	2	37	2	3	1	9.5	6.9	2	3	1	2	2	26	65	2	2	2	4.7	3	1.3	2.4	160	1	2	10	2	51	2	15	10	7.2	4	70	2	1	3
KG0159	9.23	8.47	6.78	1	2	2	32.6	2	2	4	2	44.3	3	4	1	10	7.1	2	2	1	3	2	26	65	2	2	2	4.7	3	1.4	2.8	183	1	3	14.3	2	50.5	1	12.8	9	5.8	4	73	2	3	1
KG0160	9.45	8.61	7.42	1	3	2	34.8	1	2	4.7	1	30.3	3	1	2	11	8.5	4	3	1	5	1	25	66	1	3	2	4.7	3	1.3	2.2	158	1	2	13.7	3	57.5	2	16.8	11.2	8.4	2	86	2	3	2
KG0161	9.54	9.16	8.3	1	3	3	34.8	1	2	4.3	1	40.7	2	1	3	11.7	8.1	4	3	1	5	1	26	65	1	3	2	4.3	2	1.2	2.3	161	1	2	16	2	61	3	17	11.4	9	2	82	1	3	3
KG0162	8.81	7.89	6.43	4	3	3	22	2	2	3.1	2	45	3	4	1	9	6.4	2	3	1	1	3	26	67	2	2	2	4.4	2	1	1.4	230	1	1	11	4	50	1	16.1	11.2	7.6	2	40	1	1	3
KG0163	7.79	7.12	6.18	1	2	1	18.6	2	2	4	2	32	3	1	1	9.3	6.1	4	2	1	1	3	25	65	1	3	1	3.8	1	0.9	1.1	258	2	3	11.3	4	56.5	2	17	11.5	8.7	1	37	2	1	3
KG0164	7.27	6.27	5.07	3	2	3	15.4	1	2	5.5	1	42.7	2	1	2	10.7	8	2	2	1	5	1	28	65	1	3	1	3.3	2	1.1	0.9	260	2	3	12.3	2	60	2	14.3	9.7	6.6	4	40	2	3	3
KG0165	7.57	6.46	5.14	3	3	3	10.6	2	2	3	2	51.3	1	1	1	9.2	6.4	2	2	2	4	3	26	65	2	2	1	2.9	2	1.2	0.9	255	1	2	7.3	4	62	2	15.3	10	7.9	2	27	1	1	3
KG0166	9.09	7.89	7	3	2	3	33.4	1	2	3.3	1	56.7	1	3	2	11.4	7.6	3	3	1	5	3	30	65	1	3	2	4.2	2	1.2	2.1	171	2	3	19.3	3	53.5	2	13.7	8.8	6.7	2	73	1	3	2
KG0167	8.41	7.46	6.24	1	1	3	24.1	1	3	3.2	1	62.3	3	4	2	11.3	8.6	3	2	1	5	1	31	65	1	3	1	3.5	2	1	1.2	173	1	2	21	4	55	2	15.4	9.8	7.9	2	67	1	3	3
KG0168	8.44	7.43	6.1	4	1	3	23.6	1	3	3.3	1	61.3	3	4	2	10	7.1	2	3	2	4	3	31	66	1	3	2	4	2	1.2	1.1	178	1	2	12	3	50	1	12.8	8.7	7	1	70	1	1	3
KG0169	9.36	7.95	6.9	1	1	3	29.5	1	3	3.1	1	70.7	1	4	2	11	8	2	3	1	5	3	28	65	1	3	2	4.1	2	1.2	1.3	180	2	1	19	4	53	2	16.4	10.9	8.2	2	70	1	2	3
KG0170	8.33	7.32	6.6	1	2	3	25.7	1	3	4.1	1	62	2	3	2	11.3	7.9	2	3	2	5	3	32	66	1	3	1	3.7	2	1.2	1.1	183	1	1	20.3	4	52	2	15.9	11.4	8.2	4	68	1	2	1
KG0172	10.09	8.8	7.67	1	3	4	16.1	1	2	3.7	1	55.3	3	1	2	12.1	8.6	5	3	1	3	1	27	65	1	3	3	5.1	3	1.3	2.5	163	2	2	19.3	4	52	2	17	17	8.4	2	85	2	3	2
KG0176	9.86	8.53	6.95	3	3	3	40.4	1	2	3.3	1	42.7	2	3	3	10.1	7.3	2	3	1	4	1	28	65	1	3	2	4.5	3	1.3	2	145	1	2	16.7	2	52	1	16.4	16.4	8.8	4	93	1	1	2
KG0177	9.03	8.07	6.34	1	3	3	36.3	1	3	3.2	1	59.7	3	4	2	10.7	7.8	4	3	1	5	2	28	65	1	3	3	5.2	3	1.3	1.9	156	1	1	16.7	4	41	2	17.4	11.9	9.5	2	88	2	3	3
KG0178	9.61	8.25	6.92	3	2	2	39.6	2	2	2.2	2	41.3	1	3	3	9.9	7.3	3	3	1	2	1	28	65	2	3	3	5.1	2	1.2	1.8	157	1	2	11	2	52.5	2	16.1	11.3	7.6	1	85	2	1	1
KG0179	10.59	8.88	7.38	3	3	2	45.5	1	2	3.3	1	53	1	3	2	10.7	8.2	4	3	1	3	1	27	65	1	2	3	5	3	1.4	2.8	151	1	2	22.3	4	52	2	16.9	16.9	8.1	4	95	2	3	3
KG0180	10.36	9	7.16	2	3	2	50.7	1	2	4.7	1	52	2	4	3	11.2	8	3	3	1	5	1	28	66	1	3	3	5.3	2	1.4	2.3	145	1	2	19.3	4	49	2	16	11.4	7.8	2	100	2	3	1
KG0181	10.7	8.74	7.33	3	3	3	46.3	1	2	3.3	1	54	1	3	2	11.3	8	4	3	1	4	1	28	65	1	2	3	5.2	3	1.4	2.6	155	1	2	19.3	3	45	2	17.9	17.9	8.9	2	93	2	3	3
KG0182	9.45	8.33	7.02	1	2	2	39.2	1	2	4.7	1	50.7	2	3	3	11.1	7.7	2	3	1	5	2	28	65	1	3	2	4.8	2	1.2	2	161	1	2	16	2	51	2	15.8	11	9	2	85	2	3	1
KG0183	9.47	8.06	7.64	3	2	2	37.1	2	2	3.2	2	43.3	3	1	3	10.7	7.8	4	3	1	4	2	28	65	2	3	2	4.7	3	1.3	2.1	165	1	3	10.3	2	50	3	15.8	11.5	8.6	2	83	2	2	2
KG0185	9.64	8.21	6.29	4	1	2	29.3	2	3	3.2	2	70.7	3	4	2	11.9	8.7	2	3	1	3	1	28	67	2	3	2	4.3	2	1.2	1.5	170	1	1	14.7	3	57	2	15.9	11.4	9	2	73	2	1	3
KG0188	9.9	8.6	8.11	1	2	1	41.1	2	2	3	2	53.7	1	1	2	11.2	7.6	4	3	1	5	2	28	65	2	3	2	4.7	3	1.3	2.5	160	1	2	21.7	3	52.5	3	15.9	10.9	9.1	2	85	1	1	1
KG0189	8.65	8.38	6.97	1	1	2	27.8	1	2	3.1	1	29.7	2	3	2	9.7	7.2	4	3	1	5	1	32	66	1	3	2	4.5	3	1.3	1.8	185	1	2	10.7	2	47.5	1	14.3	9.4	7.3	2	64	1	1	3
KG0190	9.04	7.95	6.28	1	1	2	27.5	1	2	3.8	1	33.3	3	3	2	10.5	7.8	4	2	1	5	1	28	65	1	3	2	4.8	3	1.3	2.3	188	1	2	15	3	48	1	16.3	16.3	8.7	2	65	2	3	3
KG0191	8.5	8.33	7.42	1	2	1	30.5	2	2	3.1	2	53	2	3	2	10	7.8	4	2	1	4	3	26	65	2	3	2	4	2	1.2	2.2	172	1	2	18.7	4	60	2	15.8	11	7.4	2	75	1	3	1
KG0192	7.47	7.12	5.86	1	1	3	21.6	1	2	4.7	1	44	2	1	2	116	8.3	4	3	1	5	2	28	65	1	3	2	4.4	3	4.3	1.8	208	1	1	11.7	3	50	3	12	10	8	4	54	2	3	1
KG0193	9.02	8.36	6.85	1	2	3	29.3	2	2	1.7	2	54	1	4	2	11.1	7.9	4	3	1	4	3	27	65	2	3	2	4.3	2	1.2	2	173	1	1	15.3	4	61	3	15	10.5	7	2	67	1	3	2
KG0194	9.14	8.64	7.67	1	2	3	30.8	2	2	3.2	2	53.7	1	3	2	10.1	7.1	2	2	1	4	3	25	65	2	2	2	4.1	2	1.1	2.2	168	1	2	18	4	62	3	15.6	11	8	2	70	2	3	2
KG0195	9.43	8.85	7.54	1	3	2	36.7	1	2	3	1	46.3	2	1	2	10.9	8.2	3	3	1	5	3	27	65	1	3	3	5.1	3	1.3	2.4	158	1	2	14	4	59	1	15.9	10.9	9.1	2	86	1	3	2
KG0196	10.4	8.47	7.29	1	2	2	37.3	2	2	3.1	2	52.3	2	4	2	9.8	7.6	4	2	1	2	2	26	65	2	2	2	4.6	2	1.2	2.3	158	1	3	18	2	53	1	18	40.9	7.8	4	85	2	3	3
KG0197	9.6	8.72	7.58	1	3	3	31.9	1	2	2.4	1	34.7	1	3	2	10.6	7.6	4	3	1	5	3	26	65	1	3	3	5.1	2	1.2	2.5	175	2	2	13	3	60.5	3	15.7	15.7	8.7	2	75	2	1	3
KG0198	9.34	8.72	7.55	2	3	3	31.2	1	2	2.7	1	40.7	1	3	2	11.1	7.5	2	3	1	5	2	26	65	1	3	2	4.1	2	1.2	2.1	177	1	1	14.7	3	60	3	17.9	11.9	9.7	2	73	1	1	3
KG0199	8.58	7.63	5.94	2	2	3	18.3	2	2	5	2	54.7	1	3	1	11.1	8.2	4	2	2	5	3	26	65	2	3	2	4.2	2	1.2	1.6	237	1	2	15	4	58.5	2	16.9	16.9	8.1	2	48	1	3	1
KG0200	9.49	8.96	8.22	1	3	2	35.6	1	2	3.3	1	38.7	2	1	2	10.3	9.2	4	3	1	5	1	26	65	1	3	2	4.2	3	1.3	2.3	153	1	2	13.3	3	61	1	15.9	11.4	9	4	90	1	1	2
KG0085	8.25	7.68	6.9	3	2	3	27.24	1	2	3.3	2	31.5	3	1	1	13.6	2.2	3	2	1	5	1	26	65	1	2	3	4	1	1.2	1.9	195	2	2	6.2	4	49	2	16.2	11.2	8.1	2	72	2	3	3
KG0086	8.04	7.73	6.74	3	2	2	29.16	2	2	2.8	2	29.2	2	1	1	13.8	3.3	3	2	1	3	1	26	65	3	1	2	4.8	2	1.4	2.6	258	1	2	20	2	65	1	15.7	8.8	8.9	1	83	2	1	2
KG0088	8.76	8.44	7.76	1	2	2	37.86	2	2	3.7	3	33.5	1	1	2	9.9	7.8	5	2	1	3	1	28	65	3	2	1	5.1	3	1.2	2.2	220	1	2	14.7	3	65	1	15	11.6	8	2	54	1	1	1
KG0144	9.9	8.8	7	3	3	3	45	2	2	4.1	2	43	2	1	2	11.2	8.9	3	3	2	3	1	27	71	2	2	3	4.5	2	1.2	2.2	155	1	1	17	3	52	3	17.2	11.8	7.8	2	76	2	3	2
KG0146	9.9	9.2	7.3	3	3	2	43	1	2	3.1	1	36.5	2	1	2	12.1	8.3	2	3	1	2	1	28	68	1	2	1	4.3	2	1.2	2	200	1	1	14.3	2	53	3	16.9	11.6	8	2	68	1	1	3
KG0154	10.64	8.28	6.94	3	2	2	40.5	1	2	3.7	1	50.7	2	3	3	9.3	6.1	4	3	1	5	2	28	65	1	3	2	4.9	2	1.2	1.8	155	1	1	16	4	52.5	2	17.9	11.5	9.4	2	90	1	1	2
KG0171	9.98	8.69	7.09	1	3	4	45.9	1	2	4.2	1	58.3	1	4	3	11.5	8.5	4	3	1	4	2	27	65	1	3	3	5.3	3	1.4	2.9	150	1	1	18.7	4	55	3	16.5	11	8.6	2	88	1	3	1
KG0173	11.13	9.25	6.64	4	3	3	43.6	2	2	2.7	2	45	3	3	3	11.1	8.4	2	3	1	4	3	26	65	2	3	3	5.5	3	1.3	2.1	175	1	1	14.7	4	55	2	16.1	16.1	8.6	4	80	2	3	2
KG0175	9.56	8.82	7.7	1	3	3	35.8	1	2	3.2	1	47.7	2	1	2	10.6	7.7	4	3	1	5	1	26	65	1	3	2	4.4	2	1.2	2.3	172	1	2	17	4	52	2	14.9	10.5	7	4	75	1	3	2
KG0175_1	10.41	9.22	7.49	3	3	2	51.2	1	2	3.2	1	50.7	1	1	2	11.5	8.2	2	3	1	5	3	28	65	1	3	3	5.8	3	1.4	3.3	140	1	1	17.3	4	51	2	16.1	11.6	7.9	2	98	2	3	2
KG0184	10.52	8.89	7.38	1	3	3	39.1	1	2	3.3	1	44	1	4	3	10.8	7.6	4	3	1	2	3	26	65	1	3	2	4.5	3	1.3	2.6	165	2	1	18.3	2	58.5	2	15.5	10.6	7.3	2	82	2	2	3
KG0186	9.33	8.85	8.08	1	3	3	33.7	1	2	3.3	1	36.3	1	1	2	11.4	8.2	3	3	1	4	1	26	65	1	2	3	5	3	1.3	2	165	1	2	13.7	4	60	1	16.7	16.7	8.4	2	80	2	1	3
KG0186_1	8.84	7.93	6.4	1	3	2	26.9	1	2	3.1	1	46.7	1	1	1	10.7	7.8	4	3	1	4	1	28	65	1	3	2	4.4	3	1.3	2.1	160	1	2	20	4	48	3	17.8	11.4	9.6	2	70	2	1	3
